# Supplementary material for: Whole genome sequencing reveals hidden transmission of carbapenemase-producing Enterobacterales
Source: PubMed Central journal article supplement (PMC9160272; doi:10.1038/s41467-022-30637-5), 2022-06-01
Supplement: 41467_2022_30637_MOESM1_ESM.pdf [file 41467_2022_30637_MOESM1_ESM.pdf]

## Supplementary Information

|                                                                                                                                                                                                                                         |           |
|-----------------------------------------------------------------------------------------------------------------------------------------------------------------------------------------------------------------------------------------|-----------|
| <b>Supplementary Methods</b> .....                                                                                                                                                                                                      | <b>2</b>  |
| Hospital characteristics and infection prevention measures .....                                                                                                                                                                        | 2         |
| Bacterial isolates and microbiological methods .....                                                                                                                                                                                    | 2         |
| Whole-genome short-read sequencing and assembly .....                                                                                                                                                                                   | 2         |
| Long-read sequencing and hybrid assembly with short-read sequencing data .....                                                                                                                                                          | 2         |
| Genomic species identification .....                                                                                                                                                                                                    | 2         |
| Carbapenemase gene identification .....                                                                                                                                                                                                 | 3         |
| Grouping of isolates into ST-clusters .....                                                                                                                                                                                             | 3         |
| Selection of reference sequence for each ST-cluster from ONT-based hybrid assemblies .....                                                                                                                                              | 3         |
| Bacterial core genome analysis .....                                                                                                                                                                                                    | 4         |
| Determination of mutation rate of bacterial species and single-nucleotide polymorphism (SNP) threshold for clonal transmission .....                                                                                                    | 4         |
| Establishment of the plasmid genome sequence reference database .....                                                                                                                                                                   | 5         |
| Identification of carbapenemase-encoding plasmid and determination of plasmid-mediated transmission .....                                                                                                                               | 5         |
| <b>Supplementary Figures</b> .....                                                                                                                                                                                                      | <b>7</b>  |
| Supplementary Figure 1. Flowchart describing the grouping of isolates into ST-clusters for bacterial core genome analysis. ....                                                                                                         | 7         |
| Supplementary Figure 2. Flowchart describing the core genome analysis.....                                                                                                                                                              | 8         |
| <b>Supplementary Tables</b> .....                                                                                                                                                                                                       | <b>9</b>  |
| Supplementary Table 1. CPE infection prevention and control measures in the participating sites during the study period. ....                                                                                                           | 9         |
| Supplementary Table 2. Reference genome sequences selected for each ST-cluster from ONT-based hybrid assemblies. ....                                                                                                                   | 11        |
| Supplementary Table 3. Mutation rate estimation using BEAST. ....                                                                                                                                                                       | 13        |
| Supplementary Table 4. Number of plasmid genome sequences forming the carbapenemase gene-specific plasmid databases.....                                                                                                                | 14        |
| Supplementary Table 5. Peaks in time-trends analysis (Figure 2) derived from bootstrapping.....                                                                                                                                         | 15        |
| Supplementary Table 6. Rate of increase and decline of different transmission types. ....                                                                                                                                               | 16        |
| Supplementary Table 7. Factors associated with clonal transmission of CPE for sensitivity analyses restricted to only source isolates which were sampled at least 7 days before genomically-linked acquisition isolates. ....           | 17        |
| Supplementary Table 8. Factors associated with plasmid-mediated transmission of CPE for sensitivity analyses restricted to only source isolates which were sampled at least 7 days before genomically-linked acquisition isolates. .... | 19        |
| <b>Supplementary Information on Custom Code</b> .....                                                                                                                                                                                   | <b>21</b> |
| (A) Finding suitable source patients for acquisition patients .....                                                                                                                                                                     | 21        |
| (B) Determining epidemiologic relationships for source-acquisition pairs.....                                                                                                                                                           | 26        |
| (C) Selection of controls.....                                                                                                                                                                                                          | 35        |
| <b>References</b> .....                                                                                                                                                                                                                 | <b>43</b> |

## Supplementary Methods

### Hospital characteristics and infection prevention measures

Hospital characteristics and infection prevention measures are described in detail in Figure 3 (in the Manuscript) and Supplementary Table 1.

### Bacterial isolates and microbiological methods

Within individual hospital microbiology laboratories, carbapenem non-susceptibility was suspected when minimum inhibitory concentration (MIC) using automated testing systems (VITEK® 2 instrument) was  $>1$  mg/L for imipenem or meropenem, or zone diameter on disc diffusion testing was  $\leq 23$  mm for imipenem or meropenem disk<sup>1</sup>. Carbapenem MICs were confirmed by Etest (bioMérieux, Marcy l'Étoile, France) with susceptibility defined according to either European Committee on Antimicrobial Susceptibility Testing (EUCAST) or Clinical & Laboratory Standards Institute (CLSI) breakpoints as per the preferred standard adopted by different hospital laboratories. Bacterial isolates were identified using matrix-assisted laser desorption/ionization time-of-flight mass spectrometry (MALDI-TOF MS) (Bruker Daltonics GmbH, Bremen, Germany).

At the National Public Health Laboratory (NPHL), the presence of carbapenemase production was investigated phenotypically using diagnostic meropenem tablets of the KPC/Metallo- $\beta$ -lactamase Confirmation Kit (Rosco Diagnostica A/S, Taastrup, Denmark). Characterisation of  $\beta$ -lactamase genes was performed by PCR assays targeting class A carbapenemases (*bla*<sub>KPC</sub>, *bla*<sub>GES</sub>, *bla*<sub>IMI-1</sub> and *bla*<sub>NMC-A</sub>), class B metallo- $\beta$ -lactamases (*bla*<sub>NDM</sub>, *bla*<sub>VIM</sub> and *bla*<sub>IMP</sub>) and class D carbapenemases (*bla*<sub>OXA-48</sub>-like and *bla*<sub>OXA-23</sub> carbapenemases)<sup>1-3</sup>. Carbapenem non-susceptibility due to porin loss associated with extended-spectrum  $\beta$ -lactamases and AmpC overproduction was not investigated. Isolates were stored and re-cultured prior to DNA extraction.

### Whole-genome short-read sequencing and assembly

Sequencing libraries for each isolate were prepared according to the manufacturer's recommendation using the Illumina Nextera XT kit, and sequenced on the MiSeq platform as previously described<sup>4</sup>.

Adapter and quality trimming were performed using Cutadapt (v1.14), with minimum quality score set to 20, and filtering reads shorter than 20bp<sup>5</sup>. *De novo* assembly of the Illumina reads was performed using SPAdes Genome Assembler (v3.11.1; with the "careful" option activated)<sup>6</sup>.

### Long-read sequencing and hybrid assembly with short-read sequencing data

Long-read sequencing data was available for 874 isolates using the Oxford Nanopore Technologies (ONT) platform. Libraries for long-read sequencing were prepared using the ONT Rapid Barcoding Kit (RBK004) and sequenced on R9.4.1 flowcells on a GridION platform. Hybrid assemblies of ONT long-read sequence data with Illumina short-read data were generated using the Unicycler (v0.48) with default parameters<sup>7</sup>.

### Genomic species identification

Bacterial species and sequence-type (ST) were assigned for each isolate based on the genomic sequence using MLST 2.8<sup>8</sup>. For isolates that could not be assigned a species by MLST 2.8, the CGE Bacterial Analysis Pipeline and Kraken (v1.0) (with default parameters) were applied to reattempt species assignment<sup>9,10</sup>. Isolates with species discordance comparing phenotypic with genotypic species assignment on all three methods were excluded from further analysis.

### **Carbapenemase gene identification**

Genomic carbapenemase gene allele assignments were obtained using BLASTN (v2.2.31+) against the NCBI Beta-Lactamase Database (downloaded in May 2017), filtering for 100% identity and 100% subject alignment coverage<sup>11</sup>. For isolates that could not be assigned a carbapenemase gene allele based on the NCBI Beta-Lactamase Database, the CGE Bacterial Analysis Pipeline and SRST2 (v0.2.0) querying the ARG-ANNOT database (ARG-ANNOT-Nt-V3 curated within the SRST2 package) were used<sup>9,12,13</sup>. Isolates for which the genomically-assigned carbapenemase gene on all three methods was discordant compared with the laboratory PCR-determined carbapenemase gene were excluded from further analysis.

### **Grouping of isolates into ST-clusters**

For species with available sequence-type (ST) databases, the species-specific MLST allelic profiles were downloaded from PubMLST (<https://pubmlst.org/data/>; Date of download: 10 January 2018 for *K. pneumoniae*, 13 March 2018 for *E. coli* and *E. cloacae*, 17 August 2018 for *C. freundii* and *K. oxytoca*). To achieve computational tractability, species-specific sequence-type clusters (ST-clusters) were determined using the PubMLST reference ST profiles, combined with novel STs with non-ambiguous alleles that were detected in our sequenced dataset. This combined dataset was clustered according to the seven gene alleles, allowing for up to two allele mismatches between members of a cluster. STs within an ST-cluster were defined as having  $\leq 2$  allele mismatches compared with at least one member of the same ST-cluster.

The isolates from *K. pneumoniae*, *E. coli* and *E. cloacae* within our dataset (accounting for 90% of isolates) were then assigned to an ST-cluster according to the assignments established above (Supplementary Figure 1). Clustering of STs did not result in grouping of isolates for *C. freundii* and *K. oxytoca*.

For each ST-cluster, a complete reference genome sequence was selected by BLASTN to aid in further merging of ST-clusters as follows: The longest assembled contig of a random isolate from each ST-cluster was BLASTN-searched against the NCBI RefSeq Genome Database (<https://www.ncbi.nlm.nih.gov/refseq/>; date of download: July 2018; filtered for the respective organism name; BLASTN parameters: max target sequences = 500, expect threshold = 0.001). The complete genome with the highest MaxScore was assigned as the reference ST-cluster specific sequence. For ST-clusters where the longest contig did not return a complete genome match using BLAST, the next longest contigs were sequentially used for the BLASTN-search until a successful match was returned. Finally, groups with identical reference NCBI RefSeq closed-genome sequences selected by this method were merged.

The remaining ungrouped isolates were combined with existing ST-clusters by mapping the adapter-trimmed Illumina reads of the isolate against the selected reference sequences using SMALT with default parameters and assigning the isolate to the ST-cluster with the highest reference genome coverage (ensuring a minimum threshold of 90%) (Supplementary Figure 1). Isolates that remained unassigned to ST-clusters by this method were grouped among themselves with isolates that had  $\leq 2$  gene allele mismatches based on the seven genes used for MLST determination, as described above (Supplementary Figure 1). For species with no available ST databases, all isolates of the species were treated as a single group (Supplementary Figure 1).

### **Selection of reference sequence for each ST-cluster from ONT-based hybrid assemblies**

For each ST-cluster of *K. pneumoniae*, *E. coli* and *E. cloacae*, the longest fully circularized hybrid-assembled (Nanopore and Illumina) chromosomal genome from the

predominant ST in the ST-cluster was selected as the reference genome. For ST-clusters without a fully circularized hybrid-assembled chromosomal genome from the predominant ST, the longest fully circularized chromosomal genome among all isolates from the ST-cluster was selected. For ST-clusters that still did not have a reference genome, all isolates in the ST-cluster underwent pairwise SNP comparison with all selected reference genomes for the particular species and the reference genome with the least pairwise SNP difference was selected (refer to Supplementary Table 2 for final list of reference sequences assigned).

*C. freundii* and *K. oxytoca* only had a fully circularized chromosomal genome for the predominant ST of one ST-cluster respectively, and hence this genome was assigned as the reference sequence for all ST-clusters of the species. For *C. amalonaticus*, *C. koseri*, *C. rodentium*, *E. aerogenes*, *M. morgani*, and *P. mirabilis*, the longest available fully circularized chromosomal genome was selected as the reference sequence. As *C. farmeri* did not have any fully circularized chromosomal genome, the reference used for *C. freundii* was assigned as the reference sequence for the species (refer to Supplementary Table 2 for final list of reference sequences assigned).

Due to the requirement of the recombination filtering step to have more than 3 sequences, sequences of *C. farmeri* ( $N=2$ ) and *C. rodentium* ( $N=2$ ) were analyzed as a single group, and as described above, the reference used for *C. freundii* was assigned as the reference sequence for this group (refer to Supplementary Table 2 for final grouping and list of reference sequences assigned).

### **Bacterial core genome analysis**

Core genome analysis was performed based on previously published methods<sup>14</sup> (Supplementary Figure 2). Gene annotation was performed for all isolates using Prokka (v1.12)<sup>15</sup>. The annotations (gff files) of all isolates for a given species were then used as input for Roary (v1.007002; with parameters `-e --mafft -g 60000 -cd 95`; BLASTP identity threshold at the default 95%), to generate a core gene alignment of genes that were present in at least 95% of the isolates of the species<sup>16</sup>.

For each ST-cluster, the single-nucleotide polymorphisms (SNPs) based on the core gene alignment were called using SNP-sites (v2.4.1), with the consensus sequence of the alignment as a reference<sup>17</sup>. To validate the alignment-based SNP calls, mapping of the short-read data followed by SNP calling was also performed using Snippy (v3.1; <https://github.com/tseemann/snippy>). Only SNPs in the core gene alignment that were found to be supported by the mapping-based SNP calling were retained in the alignment, while unvalidated SNPs were masked.

The resulting core gene alignment for each ST-cluster was “padded” with invariant sites in a proportion according to the GC content and length of the selected ONT-based reference genome (Supplementary Table 2). Due to the requirement of the recombination filtering step to have more than 3 sequences, core gene alignments of ST-clusters with  $\leq 3$  isolates were merged with other ST-clusters within the same species to form groups with 4 or more sequences for analysis. The longest reference sequence was selected as the reference for the merged ST-cluster (refer to Supplementary Table 2 for final grouping and list of reference sequences assigned). The “padded” alignments were then filtered to remove recombinant regions using Gubbins (v2.3.4)<sup>18</sup>.

### **Determination of mutation rate of bacterial species and single-nucleotide polymorphism (SNP) threshold for clonal transmission**

For *K. pneumoniae*, *E. coli*, *E. cloacae* and *C. freundii*, the recombination-filtered alignment of the ST with the largest number of isolates (*K. pneumoniae* ST14, *E. coli* ST131, *E. cloacae* ST93 and *C. freundii* ST22) was “padded” again as described above to produce an

alignment as input for BEAST (v2.5.2) for estimation of a mutation rate for the species (Supplementary Table 3)<sup>19</sup>. Three independent BEAST runs were performed for each dataset, with the following parameters adapted from a previously published study: site model set as bModelTest, strict clock rate, prior set as “coalescent constant population”, and Monte Carlo Markov chain (MCMC) iterations set as 300 million<sup>20,21</sup>. The combined effective sample sizes (ESS) for all parameters was greater than 200. The resulting mutation rates (substitutions/genome/year) were 1.01 for *K. pneumoniae*, 0.33 for *E. coli*, 1.06 for *E. cloacae* and 2.72 for *C. freundii*, which were used as the SNP thresholds for defining clonal transmission (Supplementary Table 3).

Due to the limited number of isolates for bacterial species apart from *K. pneumoniae*, *E. coli*, *E. cloacae* and *C. freundii*, the SNP thresholds were applied as follows: SNP threshold for *K. pneumoniae* was used for *K. oxytoca*, *M. morgani* and *P. mirabilis*, SNP threshold for *E. cloacae* was used for *E. aerogenes*, and SNP threshold for *C. freundii* was used for *C. amalonaticus*, *C. koseri* and *C. rodentium/C. farmeri*.

Clonal transmission was established between the isolates if they shared the same ST-cluster, same carbapenemase gene allele and had pairwise SNP count (based on the recombination-filtered core gene alignments) below the BEAST-derived mutation rate threshold, assuming a Poisson distribution for the accumulation of mutations<sup>22</sup>. All carbapenemase genes were considered for establishing clonal transmission for isolates having co-carriage of more than one carbapenemase gene.

### **Establishment of the plasmid genome sequence reference database**

Reference databases of plasmid genome sequences for each carbapenemase gene allele were generated from complete plasmid genome sequences from NCBI RefSeq and fully circularized plasmid genome sequences obtained from the ONT-based hybrid assemblies, as described below.

Using the search term “plasmid”, plasmid sequences were downloaded from the NCBI RefSeq database (Date of download: July 2018). The dataset was then filtered to only include sequences with identifiers that meet the keyword criteria “plasmid” AND “circular” NOT “gene” NOT “partial” NOT “incomplete” NOT “putative”. Exact duplicate sequences were removed from the dataset. For each carbapenemase gene, all known alleles were downloaded from the ARG-ANNOT database and aligned against the plasmid sequences in the dataset<sup>13</sup>. Only plasmid sequences with 100% identity and 100% coverage of the carbapenemase gene allele were included in the respective carbapenemase gene allele-specific database (Supplementary Table 4).

In addition, a total of 542 fully circularized plasmid genome sequences generated from 529 of the 874 long-read sequencing hybrid assemblies were added to the reference database, resulting in a total of 938 complete plasmid genome sequences (Supplementary Table 4).

### **Identification of carbapenemase-encoding plasmid and determination of plasmid-mediated transmission**

Plasmid identification was performed for all isolates using PlasmidSeeker (v0.1; 2017-04-21) with default parameters, against the carbapenemase gene allele-specific reference databases described above to obtain candidate plasmids<sup>23</sup>. For each isolate, the carbapenemase gene-containing contig (carrying the carbapenemase gene with at least 99% identity and 90% gene coverage) from the assembly was BLAST-aligned (as query) against the candidate plasmids obtained by PlasmidSeeker. Only candidate plasmids that shared  $\geq 90\%$  k-mers with the isolate (i.e. “%Kmers found(F)”  $\geq 90\%$ ) and had carbapenemase gene-containing contig alignment with coverage of  $\geq 90\%$  were considered valid. Plasmid-mediated

transmission was then established between a pair of isolates if they shared at least one valid plasmid.

Plasmid assignment was also performed to assign a specific plasmid to each isolate, according to the following selection criteria consecutively: (i) highest query coverage, (ii) highest k-mer coverage, and (iii) longest plasmid. For isolates that had multiple valid potential plasmid assignments, priority was given to the predominant plasmid that was determined for the given carbapenemase gene (refer to the Supplementary Data for the plasmid assignments for our final dataset).

**Supplementary Figures**

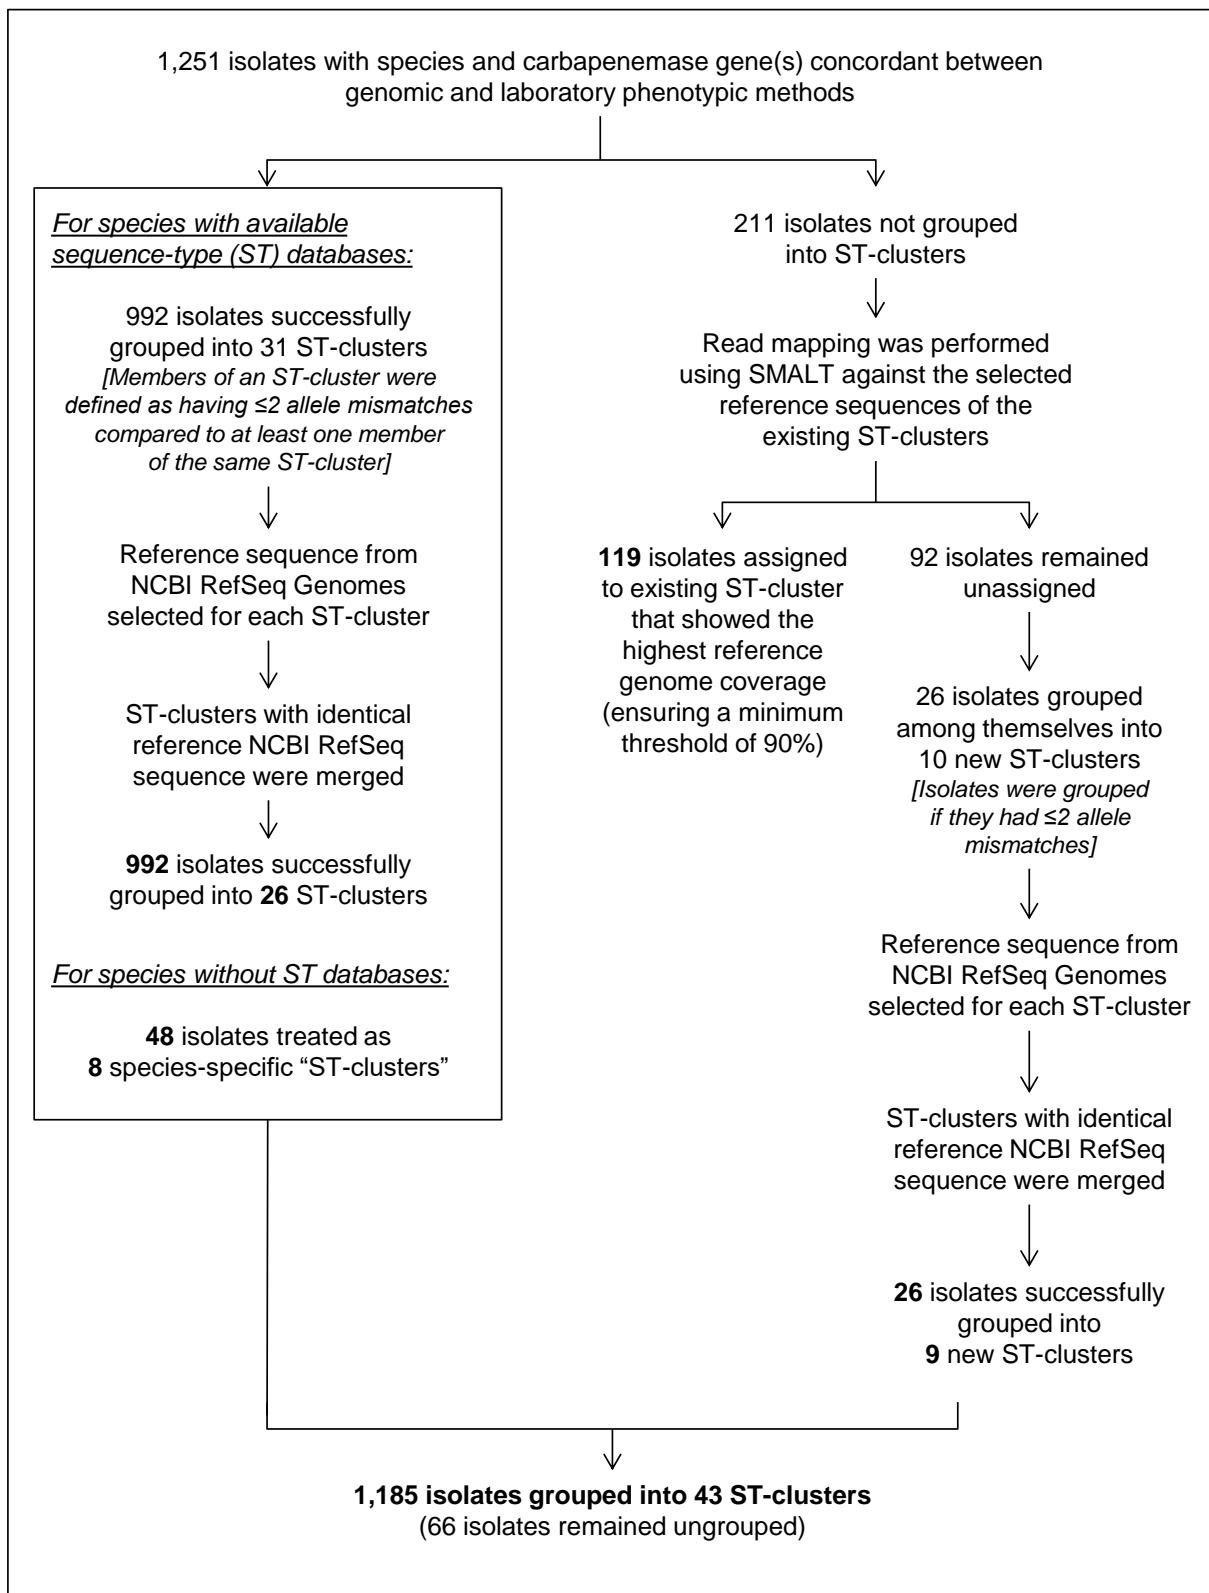

**Supplementary Figure 1. Flowchart describing the grouping of isolates into ST-clusters for bacterial core genome analysis.**

A total of 1,185 isolates were grouped into 43 ST-clusters.

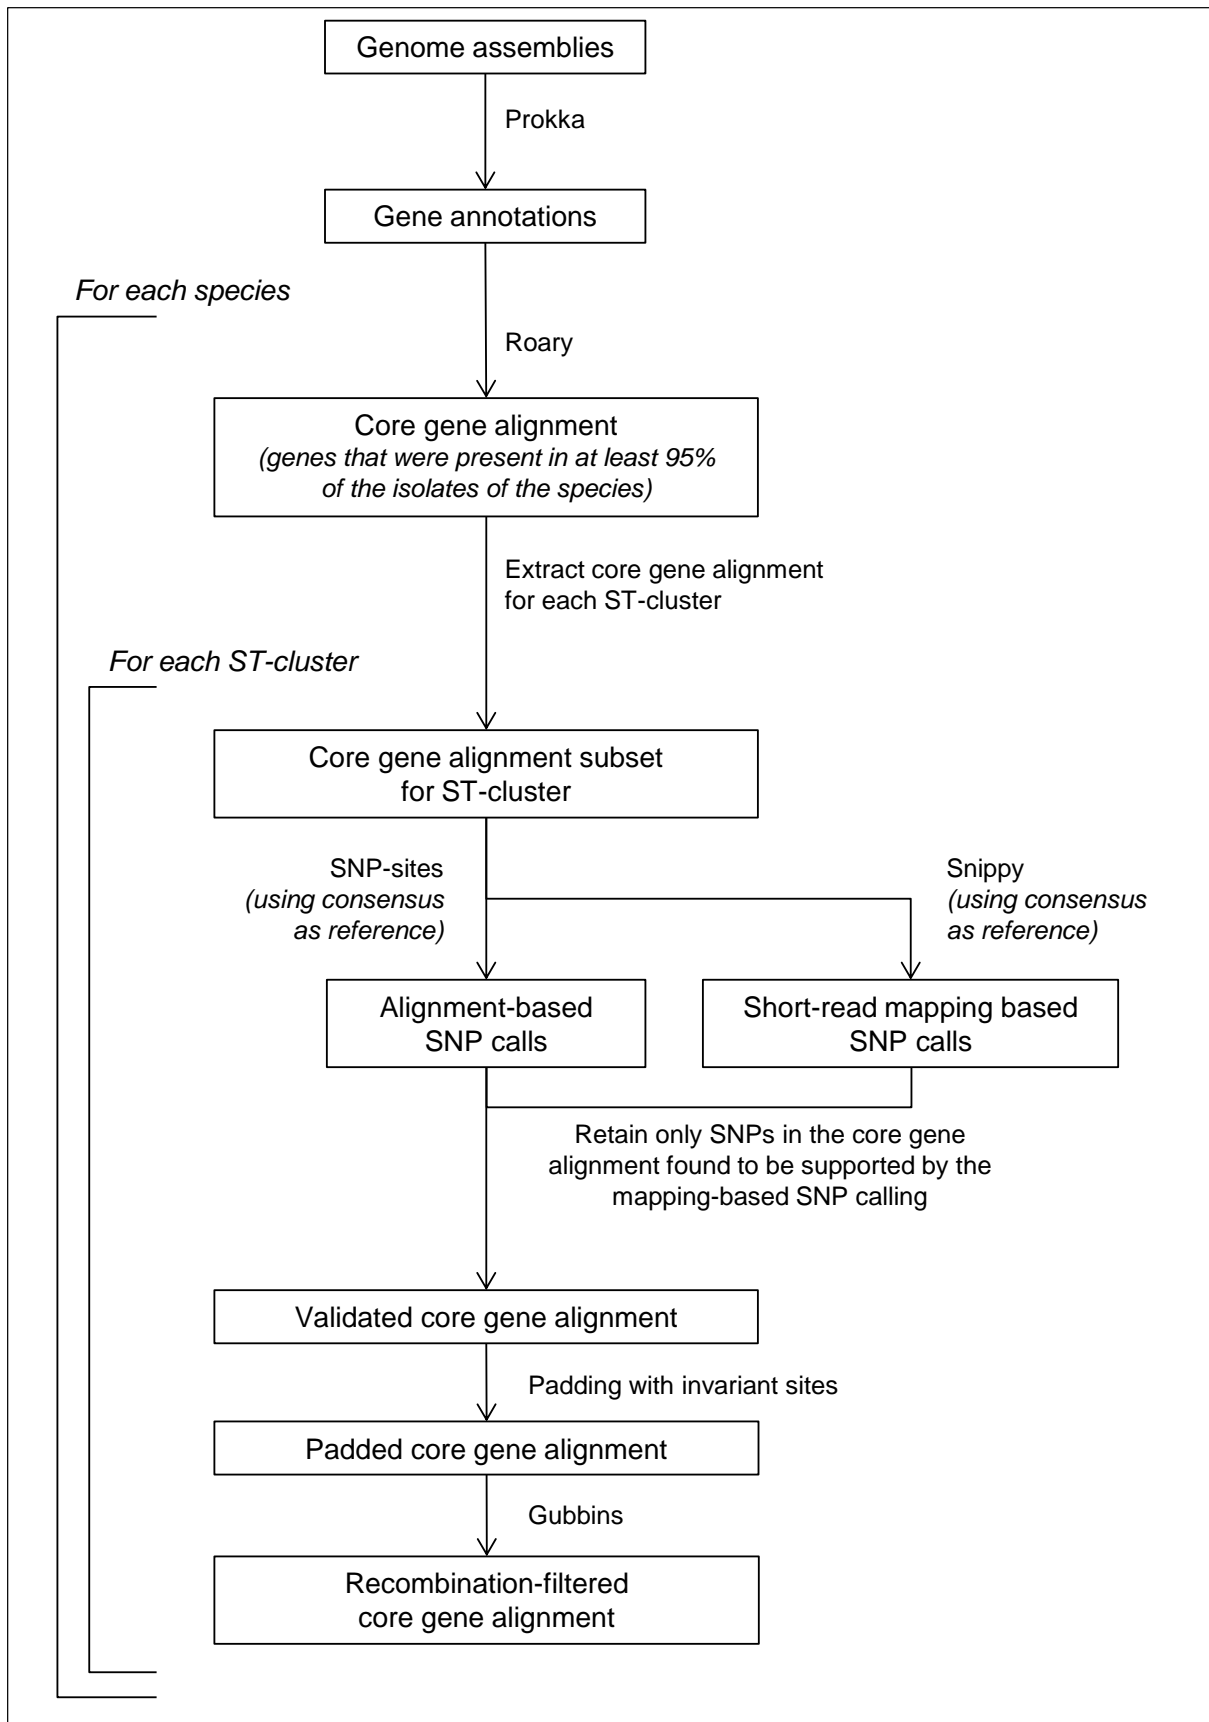

**Supplementary Figure 2. Flowchart describing the core genome analysis.**



*Supplementary Tables*

**Supplementary Table 1. CPE infection prevention and control measures in the participating sites during the study period.**

|                                                              | Hospital 1                                                                                                                  | Hospital 2                                                                                                                                               | Hospital 3                                                                                                                                    | Hospital 4                                                                                                         | Hospital 5                                                                                                         | Hospital 6                                                                                                               |
|--------------------------------------------------------------|-----------------------------------------------------------------------------------------------------------------------------|----------------------------------------------------------------------------------------------------------------------------------------------------------|-----------------------------------------------------------------------------------------------------------------------------------------------|--------------------------------------------------------------------------------------------------------------------|--------------------------------------------------------------------------------------------------------------------|--------------------------------------------------------------------------------------------------------------------------|
| Screening of high-risk patients on admission to the hospital | <ul style="list-style-type: none"> <li>• Since 2011</li> <li>• Single rectal swab</li> <li>• Compliance ~ 20-30%</li> </ul> | <ul style="list-style-type: none"> <li>• Since 2013</li> <li>• Single rectal swab</li> </ul>                                                             | <ul style="list-style-type: none"> <li>• Since 2013</li> <li>• Single rectal swab</li> <li>• Based on locally developed risk score</li> </ul> | <ul style="list-style-type: none"> <li>• Since 2013</li> <li>• Two rectal swabs</li> </ul>                         | <ul style="list-style-type: none"> <li>• Since 2013</li> <li>• Single rectal swabs</li> </ul>                      | <ul style="list-style-type: none"> <li>• Since 2013</li> <li>• Two rectal swabs</li> <li>• Compliance ~90%</li> </ul>    |
| Screening of epidemiologically linked contacts               | <ul style="list-style-type: none"> <li>• Since 2011</li> <li>• Single rectal swab</li> <li>• Compliance ~70-80%</li> </ul>  | <ul style="list-style-type: none"> <li>• Since 2013</li> <li>• Single rectal swab</li> </ul>                                                             | <ul style="list-style-type: none"> <li>• No</li> </ul>                                                                                        | <ul style="list-style-type: none"> <li>• Since 2013</li> <li>• Two rectal swabs</li> </ul>                         | <ul style="list-style-type: none"> <li>• Since 2013</li> <li>• Single rectal swabs</li> </ul>                      | <ul style="list-style-type: none"> <li>• Since 2013</li> <li>• Two rectal swabs</li> <li>• Compliance &gt;90%</li> </ul> |
| Screening on transfer to and from high-risk unit             | <ul style="list-style-type: none"> <li>• No</li> </ul>                                                                      | <ul style="list-style-type: none"> <li>• Since 2013</li> <li>• Single rectal swab</li> <li>• ICU, Haematology &amp; oncology unit, renal unit</li> </ul> | <ul style="list-style-type: none"> <li>• No</li> </ul>                                                                                        | <ul style="list-style-type: none"> <li>• No</li> </ul>                                                             | <ul style="list-style-type: none"> <li>• No</li> </ul>                                                             | <ul style="list-style-type: none"> <li>• Yes</li> <li>• Rehabilitation wards</li> </ul>                                  |
| Regular point prevalence survey to estimate burden of CPE    | <ul style="list-style-type: none"> <li>• Yes</li> <li>• CPE prevalence ~1-2%</li> </ul>                                     | <ul style="list-style-type: none"> <li>• No</li> </ul>                                                                                                   | <ul style="list-style-type: none"> <li>• No</li> </ul>                                                                                        | <ul style="list-style-type: none"> <li>• No</li> </ul>                                                             | <ul style="list-style-type: none"> <li>• No</li> </ul>                                                             | <ul style="list-style-type: none"> <li>• No</li> </ul>                                                                   |
| Single room isolation or cohorting of CPE carriers           | <ul style="list-style-type: none"> <li>• Yes</li> <li>• Compliance to isolation within 24 hours ~90-95%</li> </ul>          | <ul style="list-style-type: none"> <li>• Yes</li> <li>• Compliance to isolation within 24 hours &gt;95%</li> </ul>                                       | <ul style="list-style-type: none"> <li>• Yes</li> <li>• Compliance to isolation within 24 hours &gt;95%</li> </ul>                            | <ul style="list-style-type: none"> <li>• Yes</li> <li>• Compliance to isolation within 24 hours &gt;95%</li> </ul> | <ul style="list-style-type: none"> <li>• Yes</li> <li>• Compliance to isolation within 24 hours &gt;95%</li> </ul> | <ul style="list-style-type: none"> <li>• Yes</li> <li>• Compliance to isolation within 24 hours &gt;95%</li> </ul>       |
| Contact precaution (apron/gown and gloves)                   | <ul style="list-style-type: none"> <li>• Yes</li> </ul>                                                                     | <ul style="list-style-type: none"> <li>• Yes</li> </ul>                                                                                                  | <ul style="list-style-type: none"> <li>• Yes</li> </ul>                                                                                       | <ul style="list-style-type: none"> <li>• Yes</li> </ul>                                                            | <ul style="list-style-type: none"> <li>• Yes</li> </ul>                                                            | <ul style="list-style-type: none"> <li>• Yes</li> </ul>                                                                  |
| Hand hygiene compliance enhancement program                  | <ul style="list-style-type: none"> <li>• Yes</li> </ul>                                                                     | <ul style="list-style-type: none"> <li>• Yes</li> </ul>                                                                                                  | <ul style="list-style-type: none"> <li>• Yes</li> </ul>                                                                                       | <ul style="list-style-type: none"> <li>• Yes</li> </ul>                                                            | <ul style="list-style-type: none"> <li>• Yes</li> </ul>                                                            | <ul style="list-style-type: none"> <li>• Yes</li> </ul>                                                                  |

|                                     |                                                                                                                                                                                          |                                                                                                                                                                                          |                                                                                                                                                                                         |                                                                                                                                                                                          |                                                                                                                                          |                                                                                                                                          |
|-------------------------------------|------------------------------------------------------------------------------------------------------------------------------------------------------------------------------------------|------------------------------------------------------------------------------------------------------------------------------------------------------------------------------------------|-----------------------------------------------------------------------------------------------------------------------------------------------------------------------------------------|------------------------------------------------------------------------------------------------------------------------------------------------------------------------------------------|------------------------------------------------------------------------------------------------------------------------------------------|------------------------------------------------------------------------------------------------------------------------------------------|
| Antimicrobial stewardship program   | <ul style="list-style-type: none"> <li>• Yes</li> </ul>                                                                                                                                  | <ul style="list-style-type: none"> <li>• Yes</li> </ul>                                                                                                                                  | <ul style="list-style-type: none"> <li>• Yes</li> </ul>                                                                                                                                 | <ul style="list-style-type: none"> <li>• Yes</li> </ul>                                                                                                                                  | <ul style="list-style-type: none"> <li>• Yes</li> </ul>                                                                                  | <ul style="list-style-type: none"> <li>• Yes</li> </ul>                                                                                  |
| Environmental hygiene               | <ul style="list-style-type: none"> <li>• Terminal cleaning of rooms occupied by CPE carriers with chlorine-based disinfectant</li> </ul>                                                 | <ul style="list-style-type: none"> <li>• Terminal cleaning of rooms occupied by CPE carriers with chlorine-based disinfectant</li> <li>• Hydrogen peroxide vapour since 2015</li> </ul>  | <ul style="list-style-type: none"> <li>• Terminal cleaning of rooms occupied by CPE carriers with chlorine-based disinfectant</li> <li>• Hydrogen peroxide vapour since 2012</li> </ul> | <ul style="list-style-type: none"> <li>• Terminal cleaning of rooms occupied by CPE carriers with chlorine-based disinfectant</li> <li>• Hydrogen peroxide vapour or UV light</li> </ul> | <ul style="list-style-type: none"> <li>• Terminal cleaning of rooms occupied by CPE carriers with chlorine-based disinfectant</li> </ul> | <ul style="list-style-type: none"> <li>• Terminal cleaning of rooms occupied by CPE carriers with chlorine-based disinfectant</li> </ul> |
| Surveillance program for endoscopes | <ul style="list-style-type: none"> <li>• Surveillance cultures since 2012</li> <li>• Culture positive scopes are quarantined and reprocessed until CPE clearance is confirmed</li> </ul> | <ul style="list-style-type: none"> <li>• Surveillance cultures since 2015</li> <li>• Culture positive scopes are quarantined and reprocessed until CPE clearance is confirmed</li> </ul> | <ul style="list-style-type: none"> <li>• Surveillance cultures conducted</li> <li>• Culture positive scopes are quarantined and reprocessed until CPE clearance is confirmed</li> </ul> | <ul style="list-style-type: none"> <li>• No</li> </ul>                                                                                                                                   | <ul style="list-style-type: none"> <li>• No</li> </ul>                                                                                   | <ul style="list-style-type: none"> <li>• Yes</li> <li>• Started since 2012</li> </ul>                                                    |

Abbreviations: CPE, carbapenemase-producing *Enterobacteriales*; ICU, intensive care unit

**Supplementary Table 2. Reference genome sequences selected for each ST-cluster from ONT-based hybrid assemblies.**

| Species              | ST-cluster      | Isolate count | Isolate number of the ONT-based hybrid assembly assigned as reference genome |
|----------------------|-----------------|---------------|------------------------------------------------------------------------------|
| <i>K. pneumoniae</i> | STcluster3      | 460           | E376                                                                         |
|                      | STcluster7      | 65            | E1190                                                                        |
|                      | STcluster17*    | 3             | E69                                                                          |
|                      | STcluster29     | 12            | E69                                                                          |
|                      | STcluster30*    | 2             | E69                                                                          |
|                      | STcluster31*    | 3             | E69                                                                          |
|                      | Ungrouped       | 11            |                                                                              |
|                      | <b>Subtotal</b> | <b>556</b>    |                                                                              |
| <i>E. coli</i>       | STcluster1      | 204           | E1006                                                                        |
|                      | STcluster10     | 95            | E883                                                                         |
|                      | STcluster12     | 27            | E826                                                                         |
|                      | STcluster24     | 4             | E1006                                                                        |
|                      | STcluster28     | 11            | E826                                                                         |
|                      | STcluster29     | 3             | E1006                                                                        |
|                      | STcluster4      | 8             | E826                                                                         |
|                      | STcluster42     | 7             | E1006                                                                        |
|                      | STcluster82*    | 3             | E883                                                                         |
|                      | STcluster9      | 11            | E852                                                                         |
|                      | STcluster83*    | 2             | E883                                                                         |
|                      | STcluster84*    | 2             | E883                                                                         |
|                      | Ungrouped       | 8             |                                                                              |
|                      | <b>Subtotal</b> | <b>385</b>    |                                                                              |
| <i>E. cloacae</i>    | STcluster1      | 56            | E476                                                                         |
|                      | STcluster11     | 10            | E665                                                                         |
|                      | STcluster12*    | 3             | E995                                                                         |
|                      | STcluster18     | 6             | E665                                                                         |
|                      | STcluster23     | 8             | E995                                                                         |
|                      | STcluster24     | 4             | E200                                                                         |
|                      | STcluster3      | 39            | E579                                                                         |
|                      | STcluster6      | 15            | E995                                                                         |
|                      | STcluster25     | 3             | E665                                                                         |
|                      | STcluster27*    | 2             | E995                                                                         |
|                      | STcluster28     | 3             | E665                                                                         |
|                      | STcluster29     | 5             | E665                                                                         |
|                      | Ungrouped       | 26            |                                                                              |
|                      | <b>Subtotal</b> | <b>180</b>    |                                                                              |
| <i>C. freundii</i>   | STcluster18*    | 6             | E996                                                                         |
|                      | STcluster22     | 40            | E996                                                                         |
|                      | STcluster23*    | 2             | E996                                                                         |
|                      | Ungrouped       | 19            |                                                                              |
|                      | <b>Subtotal</b> | <b>67</b>     |                                                                              |
| <i>K. oxytoca</i>    | STcluster108*   | 11            | E743                                                                         |
|                      | STcluster135*   | 2             | E743                                                                         |

|                                  |                 |             |      |
|----------------------------------|-----------------|-------------|------|
|                                  | Ungrouped       | 2           |      |
|                                  | <b>Subtotal</b> | <b>15</b>   |      |
| <i>C. amalonaticus</i>           | -               | 10          | E994 |
| <i>C. farmeri</i> <sup>†</sup>   | -               | 2           | E996 |
| <i>C. koseri</i>                 | -               | 8           | E243 |
| <i>C. rodentium</i> <sup>†</sup> | -               | 2           | E996 |
| <i>E. aerogenes</i>              | -               | 16          | E345 |
| <i>M. morgani</i>                | -               | 4           | E164 |
| <i>P. mirabilis</i>              | -               | 5           | E648 |
| <i>S. marcescens</i>             | -               | 1           |      |
| <b>Total</b>                     |                 | <b>1251</b> |      |

\* These ST-clusters were combined within the species to be analyzed as a single group for filtering of recombination using Gubbins.

<sup>†</sup> *C. farmeri* and *C. rodentium* were analyzed as a single group for filtering of recombination using Gubbins. The reference used for *C. freundii* was assigned as the reference sequence for this group.

**Supplementary Table 3. Mutation rate estimation using BEAST.**

| <b>Species</b>       | <b>Isolates used for BEAST*</b> | <b>BEAST meanRate</b> | <b>BEAST 95% HPD interval min.</b> | <b>BEAST 95% HPD interval max. [A]</b> | <b>Length of reference genome (bases) [B]</b> | <b>Mutation rate (substitutions /genome/year) [AxB]</b> |
|----------------------|---------------------------------|-----------------------|------------------------------------|----------------------------------------|-----------------------------------------------|---------------------------------------------------------|
| <i>K. pneumoniae</i> | 57 isolates from ST14           | 9.8702 E-8            | 2.4779 E-8                         | 1.8767 E-7                             | 5,378,540                                     | 1.01                                                    |
| <i>E. coli</i>       | 65 isolates from ST131          | 2.4685 E-8            | 7.9668 E-13                        | 6.3444 E-8                             | 5,259,035                                     | 0.33                                                    |
| <i>E. cloacae</i>    | 35 isolates from ST93           | 1.0178 E-7            | 1.1773 E-8                         | 2.2133 E-7                             | 4,814,122                                     | 1.06                                                    |
| <i>C. freundii</i>   | 28 isolates from ST22           | 3.1486 E-7            | 1.1224 E-7                         | 5.2888 E-7                             | 5,149,685                                     | 2.72                                                    |

\* These are from the ST with the largest number of isolates

**Supplementary Table 4. Number of plasmid genome sequences forming the carbapenemase gene-specific plasmid databases.**

| <b>Carbapenemase gene allele</b> | <b>Obtained from NCBI RefSeq</b> | <b>Obtained from ONT-based hybrid assembly</b> | <b>Total</b> |
|----------------------------------|----------------------------------|------------------------------------------------|--------------|
| IMP-1                            | 1                                | 0                                              | 1            |
| IMP-4                            | 12                               | 4                                              | 16           |
| KPC-2                            | 174                              | 103                                            | 277          |
| KPC-6                            | 2                                | 0                                              | 2            |
| NDM-1                            | 117                              | 310                                            | 427          |
| NDM-4                            | 2                                | 5                                              | 7            |
| NDM-5                            | 32                               | 18                                             | 50           |
| NDM-7                            | 8                                | 18                                             | 26           |
| NDM-9                            | 4                                | 4                                              | 8            |
| OXA-23                           | 13                               | 0                                              | 13           |
| OXA-48                           | 26                               | 21                                             | 47           |
| OXA-181                          | 5                                | 52                                             | 57           |
| OXA-232                          | 0                                | 6                                              | 6            |
| VIM-4                            | 0                                | 1                                              | 1            |
| <b>Total</b>                     | <b>396</b>                       | <b>542</b>                                     | <b>938</b>   |

**Supplementary Table 5. Peaks in time-trends analysis (Figure 2) derived from bootstrapping.**

| §  | Transmission     | Type                | Peak (YYYY-MM) | Lower (YYYY-MM) | Upper (YYYY-MM) | Significant (Yes/ No) |
|----|------------------|---------------------|----------------|-----------------|-----------------|-----------------------|
| 1  | Clonal           | Overall             | 2014-03        | 2013-12         | 2014-06         | Yes                   |
| 2  | Plasmid-mediated | Overall             | 2014-11        | 2014-04         | 2015-04         | No                    |
| 3  | Clonal           | Surveillance        | 2014-04        | 2014-01         | 2014-07         | Yes                   |
| 4  | Plasmid-mediated | Surveillance        | 2014-11        | 2014-05         | 2015-04         | No                    |
| 5  | Clonal           | Clinical            | 2013-06        | 2013-02         | 2015-04         | No                    |
| 6  | Plasmid-mediated | Clinical            | 2013-09        | 2013-03         | 2015-04         | No                    |
| 7  | Clonal           | Hospital / indirect | 2015-04        | 2014-05         | 2015-04         | No                    |
| 8  | Clonal           | Hospital / direct   | 2014-02        | 2013-09         | 2015-04         | No                    |
| 9  | Clonal           | Ward / indirect     | 2014-04        | 2013-11         | 2015-04         | No                    |
| 10 | Clonal           | Ward / direct       | 2013-12        | 2013-07         | 2014-03         | Yes                   |
| 11 | Clonal           | No overlap          | 2015-04        | 2014-03         | 2015-04         | No                    |
| 12 | Plasmid-mediated | Hospital / indirect | 2015-04        | 2013-06         | 2015-04         | No                    |
| 13 | Plasmid-mediated | Hospital / direct   | 2013-10        | 2012-11         | 2015-04         | No                    |
| 14 | Plasmid-mediated | Ward / indirect     | 2015-01        | 2013-10         | 2015-04         | No                    |
| 15 | Plasmid-mediated | Ward / direct       | 2014-08        | 2014-04         | 2015-04         | No                    |
| 16 | Plasmid-mediated | No overlap          | 2015-04        | 2013-01         | 2015-04         | No                    |

**Supplementary Table 6. Rate of increase and decline of different transmission types.**

| <b>Transmission</b> | <b>Type</b>                             | <b>Rate of increase (acquisition patients per 10,000 patient-days per month) (95%CI)*</b> | <b>Rate of decline (acquisition patients per 10,000 patient-days per month) (95%CI)</b> |
|---------------------|-----------------------------------------|-------------------------------------------------------------------------------------------|-----------------------------------------------------------------------------------------|
| Clonal              | Overall <sup>†</sup>                    | 0.021 (0.015, 0.027)                                                                      | -0.026 (-0.049, -0.007)                                                                 |
|                     | Surveillance cultures only <sup>‡</sup> | 0.017 (0.011, 0.024)                                                                      | -0.035 (-0.060, -0.010)                                                                 |
|                     | Clinical cultures only                  | 0.003 (0.002, 0.006)                                                                      | NA                                                                                      |
| Plasmid-mediated    | Overall                                 | 0.016 (0.011, 0.024)                                                                      | NA                                                                                      |
|                     | Surveillance cultures only              | 0.013 (0.008, 0.019)                                                                      | NA                                                                                      |
|                     | Clinical cultures only                  | 0.003 (0.002, 0.005)                                                                      | NA                                                                                      |
| Clonal              | Ward, direct <sup>§</sup>               | 0.008 (0.004, 0.012)                                                                      | -0.017 (-0.029, -0.005)                                                                 |
|                     | Ward, indirect                          | 0.003 (0.002, 0.006)                                                                      | NA                                                                                      |
|                     | Hospital, direct                        | 0.002 (0.001, 0.003)                                                                      | NA                                                                                      |
|                     | Hospital, indirect                      | 0.002 (0.001, 0.005)                                                                      | NA                                                                                      |
| Plasmid-mediated    | Ward, direct                            | 0.009 (0.006, 0.015)                                                                      | NA                                                                                      |
|                     | Ward, indirect                          | 0.004 (0.002, 0.005)                                                                      | NA                                                                                      |
|                     | Hospital, direct                        | 0.000 (0.000, 0.001)                                                                      | NA                                                                                      |
|                     | Hospital, indirect                      | 0.001 (0.000, 0.003)                                                                      | NA                                                                                      |

\* Unless otherwise specified the rate of increase is determined over the study period.

<sup>†</sup> For clonal transmission, the rate of increase was determined from September 2010 to the peak (estimated to be March 2014) and the rate of decrease was determined from then until April 2015.

<sup>‡</sup> For clonal transmission limited to surveillance cultures, the rate of increase was determined from September 2010 to the peak (estimated to be April 2014) and the rate of decrease was determined from then until April 2015.

<sup>§</sup> For ward-direct-bacteria-mediated transmission, the rate of increase was determined from September 2010 to the peak (estimated to be December 2013) and the rate of decrease was determined from then until April 2015.



**Supplementary Table 7. Factors associated with clonal transmission of CPE for sensitivity analyses restricted to only source isolates which were sampled at least 7 days before genomically-linked acquisition isolates.**

| Variable                                    | Clonal transmission case pairs (N=1198) (%) | Control pairs (N=1198) (%) | Clonal transmission case pairs* (weighted %) | Control pairs* (weighted %) | Univariable analysis <sup>†</sup> |         | Multivariable analysis <sup>†</sup> |         |
|---------------------------------------------|---------------------------------------------|----------------------------|----------------------------------------------|-----------------------------|-----------------------------------|---------|-------------------------------------|---------|
|                                             |                                             |                            |                                              |                             | OR (95%CI)                        | P-value | aOR (95%CI)                         | P-value |
| <b>Hospital or ward contact</b>             |                                             |                            |                                              |                             |                                   |         |                                     |         |
| No hospital nor ward contact                | 274                                         | 638                        | 22.5%                                        | 49.4%                       | ref                               | –       | –                                   | –       |
| Direct ward contact                         | 59                                          | 8                          | 9.2%                                         | 0.6%                        | 6.99 (4.17–11.7)                  | <0.0001 | 5.08 (2.82–9.15)                    | <0.0001 |
| Indirect ward contact                       | 252                                         | 139                        | 22.3%                                        | 11.2%                       | 3.80 (2.56–5.64)                  | <0.0001 | 3.23 (2.15–4.86)                    | <0.0001 |
| Direct hospital contact (No ward contact)   | 225                                         | 80                         | 21.0%                                        | 9.6%                        | 3.97 (2.51–6.28)                  | <0.0001 | 3.83 (2.39–6.14)                    | <0.0001 |
| Indirect hospital contact (No ward contact) | 388                                         | 333                        | 25.0%                                        | 29.2%                       | 2.23 (1.46–3.41)                  | 0.0002  | 2.08 (1.35–3.20)                    | 0.0008  |
| <b>Discipline contact</b>                   |                                             |                            |                                              |                             |                                   |         |                                     |         |
| No contact                                  | 911                                         | 1040                       | 74.7%                                        | 87.3%                       | ref                               | –       | –                                   | –       |
| Direct contact                              | 79                                          | 23                         | 9.2%                                         | 2.1%                        | 2.59 (1.63–4.13)                  | <0.0001 | 1.27 (0.79–2.03)                    | 0.32    |
| Indirect contact                            | 208                                         | 135                        | 16.1%                                        | 10.6%                       | 1.56 (1.10–2.20)                  | 0.012   | 1.12 (0.79–1.57)                    | 0.53    |
| <b>Procedure contact</b>                    |                                             |                            |                                              |                             |                                   |         |                                     |         |
| No contact                                  | 1185                                        | 1185                       | 99.5%                                        | 99.3%                       | ref                               | –       | –                                   | –       |
| Direct contact                              | 0                                           | 0                          | 0.0%                                         | 0.0%                        | –                                 | –       | –                                   | –       |
| Indirect contact                            | 13                                          | 13                         | 0.5%                                         | 0.7%                        | 0.86 (0.24–3.06)                  | 0.82    | –                                   | –       |

|                                      |      |      |       |       |                  |         |                  |         |
|--------------------------------------|------|------|-------|-------|------------------|---------|------------------|---------|
| <b>Bacterial species</b>             |      |      |       |       |                  |         |                  |         |
| <i>Escherichia coli</i>              | 217  | 493  | 15.7% | 41.1% | ref              | –       | –                | –       |
| <i>Klebsiella pneumoniae</i>         | 662  | 298  | 60.0% | 25.9% | 4.25 (2.64–6.84) | <0.0001 | 4.10 (2.54–6.62) | <0.0001 |
| <i>Enterobacter spp</i>              | 284  | 278  | 18.3% | 23.7% | 1.78 (1.03–3.07) | 0.038   | 2.01 (1.19–3.39) | 0.0095  |
| Others                               | 35   | 129  | 6.0%  | 9.3%  | 1.42 (0.68–2.93) | 0.35    | 1.27 (0.61–2.65) | 0.52    |
|                                      |      |      |       |       |                  |         |                  |         |
| <b>Genotypes</b>                     |      |      |       |       |                  |         |                  |         |
| <i>bla</i> <sub>KPC</sub>            | 380  | 484  | 45.7% | 45.3% | ref              | –       | –                | –       |
| <i>bla</i> <sub>NDM</sub>            | 509  | 550  | 33.7% | 41.3% | 1.24 (0.87–1.77) | 0.23    | 1.32 (0.85–2.06) | 0.22    |
| <i>bla</i> <sub>OXA-type</sub>       | 287  | 95   | 16.3% | 8.0%  | 2.13 (1.28–3.53) | 0.0034  | 2.14 (1.18–3.89) | 0.013   |
| Others                               | 22   | 69   | 4.3%  | 5.4%  | 0.96 (0.43–2.17) | 0.92    | 0.93 (0.38–2.28) | 0.87    |
|                                      |      |      |       |       |                  |         |                  |         |
| <b>Community contact<sup>‡</sup></b> |      |      |       |       |                  |         |                  |         |
| No contact                           | 1197 | 1198 | –     | –     | –                | –       | –                | –       |
| Same household                       | 0    | 0    | –     | –     | –                | –       | –                | –       |
| Same zipcode                         | 1    | 0    | –     | –     | –                | –       | –                | –       |

Abbreviations: OR, odds-ratio; aOR, adjusted odds-ratio; ref, reference; –, not applicable

\* To correct for potential bias from clustering, the prevalence of epidemiologic risk factors were inversely-weighted by a factor of one over the number of case-control pairs with identical source patient and by reducing the sample size to derive standard errors concomitantly.

† Univariable and multivariable analyses were conducted based on the weighted percentages using conditional logistic regression on matched case-control pairs. The Wald chi-square test was performed for all the risk factors with an  $\alpha$  level of 0.05 (two-sided). No adjustment was made for multiple comparisons.

‡ Community contact was excluded from univariable and multivariable analyses as the frequency of exposure was too low.

**Supplementary Table 8. Factors associated with plasmid-mediated transmission of CPE for sensitivity analyses restricted to only source isolates which were sampled at least 7 days before genomically-linked acquisition isolates.**

| Variable                                    | Plasmid-mediated transmission case pairs (N=32721) (%) | Control pairs (N=32721) (%) | Plasmid-mediated transmission case pairs* (weighted %) | Control pairs* (weighted %) | Univariable analysis <sup>†</sup> |         | Multivariable analysis <sup>†</sup> |         |
|---------------------------------------------|--------------------------------------------------------|-----------------------------|--------------------------------------------------------|-----------------------------|-----------------------------------|---------|-------------------------------------|---------|
|                                             |                                                        |                             |                                                        |                             | OR (95%CI)                        | P-value | aOR (95%CI)                         | P-value |
| <b>Hospital or ward contact</b>             |                                                        |                             |                                                        |                             |                                   |         |                                     |         |
| No hospital nor ward contact                | 9810                                                   | 15263                       | 39.4%                                                  | 52.6%                       | ref                               | –       | –                                   | –       |
| Direct ward contact                         | 656                                                    | 245                         | 2.3%                                                   | 0.6%                        | 2.13 (0.93–4.90)                  | 0.075   | 2.10 (0.72–6.16)                    | 0.17    |
| Indirect ward contact                       | 6347                                                   | 4209                        | 16.2%                                                  | 11.1%                       | 1.52 (0.89–2.61)                  | 0.13    | 1.48 (0.79–2.76)                    | 0.22    |
| Direct hospital contact (No ward contact)   | 5031                                                   | 2319                        | 14.2%                                                  | 5.8%                        | 1.84 (1.11–3.05)                  | 0.018   | 1.77 (1.03–3.02)                    | 0.038   |
| Indirect hospital contact (No ward contact) | 10877                                                  | 10685                       | 27.9%                                                  | 29.9%                       | 1.20 (0.71–2.00)                  | 0.50    | 1.17 (0.67–2.06)                    | 0.59    |
| <b>Discipline contact</b>                   |                                                        |                             |                                                        |                             |                                   |         |                                     |         |
| No contact                                  | 26450                                                  | 28509                       | 83.4%                                                  | 88.2%                       | ref                               | –       | –                                   | –       |
| Direct contact                              | 1426                                                   | 612                         | 3.9%                                                   | 1.7%                        | 1.48 (0.87–2.50)                  | 0.15    | 0.99 (0.50–1.95)                    | 0.97    |
| Indirect contact                            | 4845                                                   | 3600                        | 12.8%                                                  | 10.1%                       | 1.17 (0.70–1.94)                  | 0.55    | 1.01 (0.60–1.71)                    | 0.97    |
| <b>Procedure contact</b>                    |                                                        |                             |                                                        |                             |                                   |         |                                     |         |
| No contact                                  | 32440                                                  | 32449                       | 99.4%                                                  | 99.4%                       | ref                               | –       | –                                   | –       |
| Direct contact                              | 6                                                      | 0                           |                                                        |                             |                                   |         |                                     |         |
| Indirect contact                            | 275                                                    | 272                         | 0.5%                                                   | 0.6%                        | 0.99 (0.38–2.63)                  | 0.99    | 0.83 (0.34–2.06)                    | 0.69    |

|                                      |       |       |       |       |                  |      |                  |      |
|--------------------------------------|-------|-------|-------|-------|------------------|------|------------------|------|
| <b>Genotypes</b>                     |       |       |       |       |                  |      |                  |      |
| <i>bla</i> <sub>KPC</sub>            | 17437 | 8688  | 51.0% | 48.8% | ref              | –    |                  |      |
| <i>bla</i> <sub>NDM</sub>            | 14312 | 16479 | 40.2% | 30.9% | 0.90 (0.58–1.38) | 0.63 | 0.95 (0.62–1.47) | 0.83 |
| <i>bla</i> <sub>OXA-type</sub>       | 311   | 5113  | 6.2%  | 12.9% | 0.50 (0.14–1.76) | 0.28 | 0.53 (0.16–1.78) | 0.31 |
| Others                               | 661   | 2441  | 2.6%  | 7.4%  | 0.38 (0.06–2.53) | 0.32 | 0.40 (0.06–2.64) | 0.34 |
|                                      |       |       |       |       |                  |      |                  |      |
| <b>Community contact<sup>‡</sup></b> |       |       |       |       |                  |      |                  |      |
| No contact                           | 32710 | 32714 | –     | –     | –                | –    | –                | –    |
| Same household                       | 1     | 0     | –     | –     | –                | –    | –                | –    |
| Same zipcode                         | 10    | 7     | –     | –     | –                | –    | –                | –    |

Abbreviations: OR, odds-ratio; aOR, adjusted odds-ratio; ref, reference; –, not applicable

\* To correct for potential bias from clustering, the prevalence of epidemiologic risk factors were inversely-weighted by a factor of one over the number of case-control pairs with identical source patient and by reducing the sample size to derive standard errors concomitantly..

† Univariable and multivariable analyses were conducted based on the weighted percentages using conditional logistic regression on matched case-control pairs. The Wald chi-square test was performed for all the risk factors with an  $\alpha$  level of 0.05 (two-sided). No adjustment was made for multiple comparisons.

‡ Community contact was excluded from univariable and multivariable analyses as the frequency of exposure was too low.

### *Supplementary Information on Custom Code*

We provide here a description of methods that utilize custom code, with pseudocode where applicable. The custom code can be accessed on Github at [https://github.com/nataschamay/cp\\_transmission\\_2021](https://github.com/nataschamay/cp_transmission_2021) as well as on Zenodo at <https://doi.org/10.5281/zenodo.6363989>. Demo input and output files are also provided.

Separately, the statistical programming code is provided as a zipped package under Supplementary Software.

#### **(A) Finding suitable source patients for acquisition patients**

After grouping of isolates into ST-clusters, performing core genome analysis and determination of mutation rate of bacterial species and single-nucleotide polymorphism (SNP) threshold for clonal transmission (as described in the Supplementary Appendix), we have the following:

(1) List of all isolates and their corresponding ST cluster

- Already excluded isolates that (i) genomically-assigned species and/or CP gene were discordant compared with the laboratory-determined species and/or CP gene, (ii) lack date of culture, (iii) lack patient admission data

(2) Pairs of isolates that meet the SNP threshold for clonal transmission

- Clonal transmission was established between the isolates if they shared the same ST-cluster, same CP gene allele and had pairwise SNP count (based on the recombination-filtered core gene alignments) below the BEAST-derived mutation rate threshold, assuming a Poisson distribution for the accumulation of mutations
- The custom code for this step is **dnaDist\_Poisson.R** and can be obtained from [https://github.com/nataschamay/cp\\_transmission\\_2021/tree/main/1\\_dnaDist](https://github.com/nataschamay/cp_transmission_2021/tree/main/1_dnaDist)

The custom code for finding suitable source patients for acquisition patients is **find\_pairs.pl** and can be obtained from [https://github.com/nataschamay/cp\\_transmission\\_2021/tree/main/2\\_find\\_pairs](https://github.com/nataschamay/cp_transmission_2021/tree/main/2_find_pairs)

#### ***Pseudocode for find\_pairs.pl***

```
Foreach ST cluster and CP gene allele{  
    Get unique list of all patients who have isolates in this ST group and CP gene allele  
    Foreach patient (by ST cluster and CP gene allele){
```

**(A1)** Select the earliest isolate (by date of culture (DOC)\*) per patient per CP gene (**see Demo Table 1 for example**) (An isolate of the same patient, same ST cluster and same CP gene allele but having a later date of culture is filtered off. If there are more than one isolate on the earliest date of the same patient, same ST cluster and same CP gene allele, only one is retained (random))

\* Dates of culture are formatted as decimals using a Microsoft Excel formula:  
=YEAR(A1)+(A1-DATE(YEAR(A1),1,0))/(DATE(YEAR(A1)+1,1,0)-DATE(YEAR(A1),1,0))  
6 decimal places were sufficient to differentiate 1 day.

**(A2)** For each earliest isolate per patient, search for potential source isolates from other patients (with isolates of the same ST cluster and CP gene allele) that have date of culture earlier or equal to the selected earliest isolate of this patient

**(A3)** For each pair of isolates (source-acquisition) determined in step A2, populate the core genome-based SNPcount and Poisson-based transmission status.  
See Demo Table 3 for source-acquisition pairs for which transmission is plausible, i.e. SNP count met the BEAST-derived mutation rate threshold)

**Notes:**

- a) An isolate that is the earliest for a given patient (hence is the acquisition isolate), can also serve as a source isolate to an isolate of a different patient
- b) Isolates with multiple CP genes were allowed to match earlier isolates with any or all of the CP genes

}

**Further manual filtering steps done using Microsoft Excel:**

**(B1)** Exclude later isolate from same patient if it has the same CP gene regardless of species (but do not exclude if date of culture is the same - to give a chance to both isolates to pair with a source isolate) (**see Demo Table 2 for example**)

**(B2)** Exclude later isolate from same source patient, to retain only the earliest isolate meeting clonal transmission criteria. Hence, final result will have unique source-acquisition patient pairs (**see Demo Table 3**)

**Demo Table 1: Example for the selection of earliest isolate per patient for ST cluster “cfreundii\_CCgroup22\_40samples” (i.e. the combined outcome of steps A1 and B1 described above).**

*Note: The Patient ID, Isolate ID and dates stated here are for purpose of illustration and not actual patient information.*

| Patient ID | Isolate ID | Date of culture | Date of culture (decimal) | ST cluster                    | Species              | ST  | CP gene            | Retain?                    |
|------------|------------|-----------------|---------------------------|-------------------------------|----------------------|-----|--------------------|----------------------------|
| Patient 4  | CF1        | 30/5/2019       | 2019.410959               | cfreundii_CCgroup22_40samples | Citrobacter freundii | 107 | blaNDM-1           | Y                          |
| Patient 4  | CF2        | 8/6/2019        | 2019.435617               | cfreundii_CCgroup22_40samples | Citrobacter freundii | 107 | blaNDM-1           | N (Later isolate)          |
| Patient 6  | CF3        | 13/6/2019       | 2019.449315               | cfreundii_CCgroup22_40samples | Citrobacter freundii | 22  | blaNDM-1           | N (Later isolate)*         |
| Patient 6  | CF4        | 25/6/2019       | 2019.482192               | cfreundii_CCgroup22_40samples | Citrobacter freundii | 22  | blaNDM-1           | N (Later isolate)          |
| Patient 12 | CF5        | 23/3/2020       | 2020.227398               | cfreundii_CCgroup22_40samples | Citrobacter freundii | 22  | blaNDM-1           | Y                          |
| Patient 1  | CF6        | 11/2/2019       | 2019.115069               | cfreundii_CCgroup22_40samples | Citrobacter freundii | 22  | blaNDM-1           | Y                          |
| Patient 42 | CF7        | 8/7/2017        | 2017.519133               | cfreundii_CCgroup22_40samples | Citrobacter freundii | 22  | blaNDM-1           | Y                          |
| Patient 30 | CF8        | 23/2/2019       | 2019.147945               | cfreundii_CCgroup22_40samples | Citrobacter freundii | -   | blaNDM-1           | Y                          |
| Patient 3  | CF9        | 14/3/2019       | 2019.200000               | cfreundii_CCgroup22_40samples | Citrobacter freundii | 98  | blaIMP-1           | Y                          |
| Patient 51 | CF10       | 26/5/2019       | 2019.400000               | cfreundii_CCgroup22_40samples | Citrobacter freundii | 22  | blaNDM-1           | Y                          |
| Patient 58 | CF11       | 6/6/2019        | 2019.430137               | cfreundii_CCgroup22_40samples | Citrobacter freundii | 22  | blaNDM-1           | Y                          |
| Patient 7  | CF12       | 25/6/2019       | 2019.482192               | cfreundii_CCgroup22_40samples | Citrobacter freundii | -   | blaKPC-2           | N (Later isolate)*         |
| Patient 57 | CF13       | 12/3/2017       | 2017.196729               | cfreundii_CCgroup22_40samples | Citrobacter freundii | 91  | blaIMP-1           | Y                          |
| Patient 16 | CF14       | 15/9/2019       | 2019.706850               | cfreundii_CCgroup22_40samples | Citrobacter freundii | 22  | blaNDM-1           | Y                          |
| Patient 18 | CF15       | 1/10/2019       | 2019.750685               | cfreundii_CCgroup22_40samples | Citrobacter freundii | 107 | blaNDM-1           | Y                          |
| Patient 9  | CF16       | 18/10/2019      | 2019.797261               | cfreundii_CCgroup22_40samples | Citrobacter freundii | 22  | blaOXA-48          | N (Later isolate)          |
| Patient 9  | CF17       | 25/10/2019      | 2019.816439               | cfreundii_CCgroup22_40samples | Citrobacter freundii | 22  | blaOXA-48          | N (Later isolate)          |
| Patient 9  | CF18       | 25/10/2019      | 2019.816439               | cfreundii_CCgroup22_40samples | Citrobacter freundii | 22  | blaOXA-48          | N (Later isolate)          |
| Patient 9  | CF19       | 17/1/2020       | 2020.046576               | cfreundii_CCgroup22_40samples | Citrobacter freundii | 22  | blaOXA-48          | N (Later isolate)          |
| Patient 36 | CF20       | 23/3/2020       | 2020.227398               | cfreundii_CCgroup22_40samples | Citrobacter freundii | 22  | blaNDM-1           | Y                          |
| Patient 17 | CF21       | 24/9/2017       | 2017.732248               | cfreundii_CCgroup22_40samples | Citrobacter freundii | 22  | blaNDM-1           | Y                          |
| Patient 52 | CF22       | 7/11/2017       | 2017.852467               | cfreundii_CCgroup22_40samples | Citrobacter freundii | 22  | blaNDM-1           | Y                          |
| Patient 56 | CF23       | 14/4/2018       | 2018.284932               | cfreundii_CCgroup22_40samples | Citrobacter freundii | 22  | blaNDM-1           | Y                          |
| Patient 55 | CF24       | 24/9/2018       | 2018.731507               | cfreundii_CCgroup22_40samples | Citrobacter freundii | 22  | blaNDM-1           | Y (keep to allow pairing#) |
| Patient 48 | CF25       | 18/10/2018      | 2018.797261               | cfreundii_CCgroup22_40samples | Citrobacter freundii | 22  | blaNDM-1           | Y                          |
| Patient 43 | CF26       | 25/10/2018      | 2018.816439               | cfreundii_CCgroup22_40samples | Citrobacter freundii | -   | blaNDM-1           | N (Later isolate)*         |
| Patient 40 | CF27       | 25/10/2018      | 2018.816439               | cfreundii_CCgroup22_40samples | Citrobacter freundii | 22  | blaNDM-1           | Y                          |
| Patient 59 | CF28       | 26/10/2018      | 2018.819178               | cfreundii_CCgroup22_40samples | Citrobacter freundii | 22  | blaNDM-1           | Y                          |
| Patient 38 | CF29       | 31/10/2018      | 2018.832877               | cfreundii_CCgroup22_40samples | Citrobacter freundii | 22  | blaNDM-1           | Y                          |
| Patient 21 | CF30       | 5/11/2018       | 2018.846576               | cfreundii_CCgroup22_40samples | Citrobacter freundii | 22  | blaNDM-1           | Y                          |
| Patient 14 | CF31       | 6/11/2018       | 2018.849315               | cfreundii_CCgroup22_40samples | Citrobacter freundii | 22  | blaNDM-1           | Y                          |
| Patient 31 | CF32       | 31/12/2018      | 2019.000000               | cfreundii_CCgroup22_40samples | Citrobacter freundii | 22  | blaNDM-1           | Y                          |
| Patient 20 | CF33       | 24/1/2019       | 2019.065754               | cfreundii_CCgroup22_40samples | Citrobacter freundii | 22  | blaNDM-1           | Y                          |
| Patient 15 | CF34       | 23/12/2017      | 2017.978150               | cfreundii_CCgroup22_40samples | Citrobacter freundii | 64  | blaKPC-2           | Y (keep to allow pairing)  |
| Patient 50 | CF35       | 8/3/2019        | 2019.183562               | cfreundii_CCgroup22_40samples | Citrobacter freundii | 22  | blaKPC-2           | Y                          |
| Patient 7  | CF36       | 3/7/2019        | 2019.504110               | cfreundii_CCgroup22_40samples | Citrobacter freundii | -   | blaKPC-2           | N (Later isolate)          |
| Patient 25 | CF37       | 22/10/2019      | 2019.808219               | cfreundii_CCgroup22_40samples | Citrobacter freundii | 112 | blaKPC-2           | Y (keep to allow pairing)  |
| Patient 11 | CF38       | 19/1/2020       | 2020.052055               | cfreundii_CCgroup22_40samples | Citrobacter freundii | -   | blaKPC-2           | Y (keep to allow pairing)  |
| Patient 9  | CF39       | 8/10/2019       | 2019.769863               | cfreundii_CCgroup22_40samples | Citrobacter freundii | 22  | blaNDM-1,blaOXA-48 | Y                          |
| Patient 24 | CF40       | 20/5/2019       | 2019.383562               | cfreundii_CCgroup22_40samples | Citrobacter freundii | 22  | blaNDM-1,blaOXA-48 | Y                          |

(\*) Determined to be “later isolate” due to presence of an earlier isolate from another species (see Demo Table 2)

**Demo Table 2: Later isolate from same patient excluded if they have the same CP gene as earlier isolate regardless of species.**

*Note: The Patient ID, Isolate ID and dates stated here are for purpose of illustration and not actual patient information.*

| Patient ID | Isolate ID | Date of culture | Date of culture (decimal) | Species                  | CP gene            | Retain?                    |
|------------|------------|-----------------|---------------------------|--------------------------|--------------------|----------------------------|
| Patient 4  | CF1        | 30/5/2019       | 2019.410959               | Citrobacter freundii     | blaNDM-1           | Y                          |
| Patient 4  | CF2        | 8/6/2019        | 2019.435617               | Citrobacter freundii     | blaNDM-1           | N (Later isolate)          |
| Patient 6  | ECO1       | 12/6/2019       | 2019.446576               | Escherichia coli         | blaNDM-1           | Y                          |
| Patient 6  | CF3        | 13/6/2019       | 2019.449315               | Citrobacter freundii     | blaNDM-1           | N (Later isolate)          |
| Patient 6  | CF4        | 25/6/2019       | 2019.482192               | Citrobacter freundii     | blaNDM-1           | N (Later isolate)          |
| Patient 7  | ECL28      | 23/6/2019       | 2019.476713               | Enterobacter cloacae     | blaKPC-2           | Y                          |
| Patient 7  | KP3        | 23/6/2019       | 2019.476713               | Klebsiella pneumoniae    | blaKPC-2           | Y (keep to allow pairing#) |
| Patient 7  | CF12       | 25/6/2019       | 2019.482192               | Citrobacter freundii     | blaKPC-2           | N (Later isolate)          |
| Patient 7  | CF36       | 3/7/2019        | 2019.504110               | Citrobacter freundii     | blaKPC-2           | N (Later isolate)          |
| Patient 9  | CF39       | 8/10/2019       | 2019.769863               | Citrobacter freundii     | blaNDM-1,blaOXA-48 | Y                          |
| Patient 9  | CF16       | 18/10/2019      | 2019.797261               | Citrobacter freundii     | blaOXA-48          | N (Later isolate)          |
| Patient 9  | CF17       | 25/10/2019      | 2019.816439               | Citrobacter freundii     | blaOXA-48          | N (Later isolate)          |
| Patient 9  | CF18       | 25/10/2019      | 2019.816439               | Citrobacter freundii     | blaOXA-48          | N (Later isolate)          |
| Patient 9  | CF19       | 17/1/2020       | 2020.046576               | Citrobacter freundii     | blaOXA-48          | N (Later isolate)          |
| Patient 11 | CA1        | 19/1/2020       | 2020.052055               | Citrobacter amalonaticus | blaKPC-2           | Y                          |
| Patient 11 | CF38       | 19/1/2020       | 2020.052055               | Citrobacter freundii     | blaKPC-2           | Y (keep to allow pairing#) |
| Patient 15 | EA1        | 23/12/2017      | 2017.978150               | Enterobacter aerogenes   | blaKPC-2           | Y                          |
| Patient 15 | CF34       | 23/12/2017      | 2017.978150               | Citrobacter freundii     | blaKPC-2           | Y (keep to allow pairing#) |
| Patient 25 | ECL41      | 22/10/2019      | 2019.808219               | Enterobacter cloacae     | blaKPC-2           | Y                          |
| Patient 25 | CF37       | 22/10/2019      | 2019.808219               | Citrobacter freundii     | blaKPC-2           | Y (keep to allow pairing#) |
| Patient 43 | KP9        | 11/10/2018      | 2018.778082               | Klebsiella pneumoniae    | blaNDM-1           | Y                          |
| Patient 43 | KP10       | 25/10/2018      | 2018.816439               | Klebsiella pneumoniae    | blaNDM-1           | N (Later isolate)          |
| Patient 43 | CF26       | 25/10/2018      | 2018.816439               | Citrobacter freundii     | blaNDM-1           | N (Later isolate)          |
| Patient 55 | ECL42      | 24/9/2018       | 2018.731507               | Enterobacter cloacae     | blaNDM-1           | Y                          |
| Patient 55 | CF24       | 24/9/2018       | 2018.731507               | Citrobacter freundii     | blaNDM-1           | Y (keep to allow pairing#) |

(#) Do not exclude isolates that share exactly the same date of culture - to give a chance to both isolates to pair with source isolates. Once pairings are established, later isolate from same source patient will be excluded, resulting in unique source-acquisition patient pairs (as stated in step B2 above).



**Demo Table 3: Source-acquisition pairs that meet the criteria**, i.e. for each earliest isolate per patient per CP gene (acquisition isolate), find source isolates that

(i) are from **other patients** (with isolates of the same ST cluster and CP gene allele) that have **date of culture earlier or equal to the acquisition isolate**, and

(ii) SNP count of source-acquisition pair meets the BEAST-derived mutation rate threshold.

*Note: The Patient ID, Isolate ID and dates stated here are for purpose of illustration and not actual patient information.*

| ST cluster-CP gene                         | Acquisition patient | Acquisition isolate | Acquisition Date of culture | Source patient | Source isolate | Source Date of culture | SNPcount | Transmission plausible |
|--------------------------------------------|---------------------|---------------------|-----------------------------|----------------|----------------|------------------------|----------|------------------------|
| cfreundii_CCgroup22_40<br>samples:blaNDM-1 | Patient 40          | CF27                | 2018.816439                 | Patient 48     | CF25           | 2018.797261            | 0        | 1                      |
|                                            | Patient 14          | CF31                | 2018.849315                 | Patient 40     | CF27           | 2018.816439            | 1        | 1                      |
|                                            | Patient 14          | CF31                | 2018.849315                 | Patient 59     | CF28           | 2018.819178            | 1        | 1                      |
|                                            | Patient 14          | CF31                | 2018.849315                 | Patient 21     | CF30           | 2018.846576            | 0        | 1                      |
|                                            | Patient 14          | CF31                | 2018.849315                 | Patient 48     | CF25           | 2018.797261            | 1        | 1                      |
|                                            | Patient 36          | CF20                | 2020.227398                 | Patient 51     | CF10           | 2019.400000            | 5        | 1                      |
|                                            | Patient 24          | CF40                | 2019.383562                 | Patient 38     | CF29           | 2018.832877            | 3        | 1                      |
|                                            | Patient 59          | CF28                | 2018.819178                 | Patient 40     | CF27           | 2018.816439            | 0        | 1                      |
|                                            | Patient 59          | CF28                | 2018.819178                 | Patient 48     | CF25           | 2018.797261            | 0        | 1                      |
|                                            | Patient 18          | CF15                | 2019.750685                 | Patient 4      | CF1            | 2019.410959            | 0        | 1                      |
|                                            | Patient 21          | CF30                | 2018.846576                 | Patient 40     | CF27           | 2018.816439            | 1        | 1                      |
|                                            | Patient 21          | CF30                | 2018.846576                 | Patient 59     | CF28           | 2018.819178            | 1        | 1                      |
|                                            | Patient 21          | CF30                | 2018.846576                 | Patient 48     | CF25           | 2018.797261            | 1        | 1                      |

\* Pairs that did not meet criteria or were filtered-off by steps B1 and B2 are not shown here.

## (B) Determining epidemiologic relationships for source-acquisition pairs

Now that we have the source-acquisition isolate and patient pairs, we proceed to perform comparisons to determine if there were epidemiologic overlaps between the source and acquisition patients. Epidemiologic relationships between source-acquisition isolate and patient pairs were analyzed in terms of hospital admission, discipline, procedure and address (community) contact.

The same algorithm is applied to case pairs and control pairs (for control selection, see Section C below). The custom code files for determining epidemiologic relationships are as follows and can be obtained from [https://github.com/nataschamay/cp\\_transmission\\_2021/tree/main/3\\_find\\_epiOverlap](https://github.com/nataschamay/cp_transmission_2021/tree/main/3_find_epiOverlap)

1. find\_epiOverlap\_Adm.pl
2. find\_epiOverlap\_Discipline.pl
3. find\_epiOverlap\_Procedure.pl
4. find\_epiOverlap\_Address.pl

*Pseudocode for the admission hospital comparison in find\_epiOverlap\_Adm.pl  
(a similar algorithm is used for admission ward, discipline, procedure and address comparisons, with the necessary adaptations).*

Demo Table 4 shows a summary of admission overlap for the patient pairs in Demo Table 3, based on the full admission data provided in Annex A. Demo Table 5 provides some examples of how the criteria are met for hospital direct and hospital indirect contact.

```
##### Begin Perl pseudocode #####
For each Source-Acquisition isolate pair{
  Store: Source-Isolate; Source-Patient; Acquisition-Isolate; Acquisition-Patient

  Loop through entire admission data row by row {

    ### Acquisition-Patient
    if (Patient of admission data row = Acquisition-Patient){

      #Limit Acquisition-StartDate to risk period boundary (see Figure 1)
      if(Admission-StartDate <= Acquisition-IsolateDOC){

        if(Admission-StartDate >= Source-IsolateDOC){
          Acquisition-StartDate = Admission-StartDate;
          (i.e. store admission start date as it is)
        }
      }
    }
  }
}
```

```

        }else{
            if(Admission-StopDate >= Source-IsolateDOC){
                Acquisition-StartDate = Source-IsolateDOC;
                (i.e. set admission start date as source DOC)
            }else{
                Acquisition-StartDate out of range
            }
        }
    }else{
        Acquisition-StartDate out of range
    }

#Limit Acquisition-StopDate to risk period boundary (see Figure 1)
if(Admission-StopDate <= Acquisition-IsolateDOC){

    if(Admission-StopDate >= Source-IsolateDOC){
        Acquisition-StopDate = Admission-StopDate;
        (i.e. store admission stop date as it is)
    }else{
        Acquisition-StopDate out of range
    }
}else{
    if(Admission-StartDate <= Acquisition-IsolateDOC){
        Acquisition-StopDate = Acquisition-IsolateDOC;
        (i.e. set admission stop date as acquisition DOC)
    }else{
        Acquisition-StopDate out of range
    }
}

# Store admission data
if Acquisition dates are within risk period range{
    Keep storing all admission data rows for this Acquisition-Patient
    (Hospital, Ward, Bed, Acquisition-StartDate and Acquisition-StopDate(adjusted to risk period
boundary))
}

### Source-Patient
if (Patient of admission data row = Source-Patient){

    #Limit Source-StartDate to risk period boundary (see Figure 1)
    if(Admission-StartDate >= Source-IsolateDOC){

```

```

        if(Admission-StartDate > Acquisition-IsolateDOC){
            Source-StartDate out of range
        }else{
            Source-StartDate = Admission-StartDate;
        }
    }else{
        if(Admission-StopDate >= Source-IsolateDOC){
            Source-StartDate = Source-IsolateDOC;
        }else{
            Source-StartDate out of range
        }
    }

    #Limit Source-StopDate to risk period boundary (see Figure 1)
    if(Admission-StopDate >= Source-IsolateDOC){

        if(Admission-StopDate > Acquisition-IsolateDOC){
            if(Admission-StartDate <= Acquisition-IsolateDOC){
                Source-StopDate = Acquisition-IsolateDOC;
            }else{
                Source-StopDate out of range
            }
        }else{
            Source-StopDate = Admission-StopDate;
        }
    }else{
        Source-StopDate out of range
    }

    # Store admission data
    if Source dates are within risk period range{
        Keep storing all admission data rows for this Source-Patient
        (Hospital, Ward, Bed, Source-StartDate and Source-StopDate (adjusted to risk period boundary))
    }
}

# Assessing Hospital Direct or Indirect Contact - comparison of all-against-all admission rows that are relevant
For each Acquisition-Patient admission data row{

    For each Source-Patient admission data row{

```

```

if (If the Acquisition and Source Admission Hospital matches){
    if (Source-StartDate <= Acquisition-StopDate
        && Source-StopDate >= Acquisition-StartDate) {
        # |----Source-----|
        #           |-----Acquisition-----|

        # |----Source-----|
        #           |-----Acquisition-----|

        #                               |----Source-----|
        #           |-----Acquisition-----|
        # Note: Source already defined as DOC earlier than Acquisition

        Contact = "Hospital Direct Contact"

    }elseif(Source-StopDate < Acquisition-StartDate){

        # Source admitted before Acquisition but no overlap
        # |----Source-----|
        #           |-----Acquisition-----|

        Contact = "Hospital Indirect Contact"

    }else{

        Contact = "No Hospital Contact"; # Acquisition admitted and left before Source entered (for
THIS comparison)
    }

    }else{
        Contact = "No Hospital Contact"; # Admission Hospital not matched (for THIS comparison)
    }
}

}

##### End Perl pseudocode #####

```

**Demo Figure 1: Limiting admission start and stop dates to risk period boundary.** This is done to simplify the processing, because admission overlaps outside of the risk period boundary are not relevant.

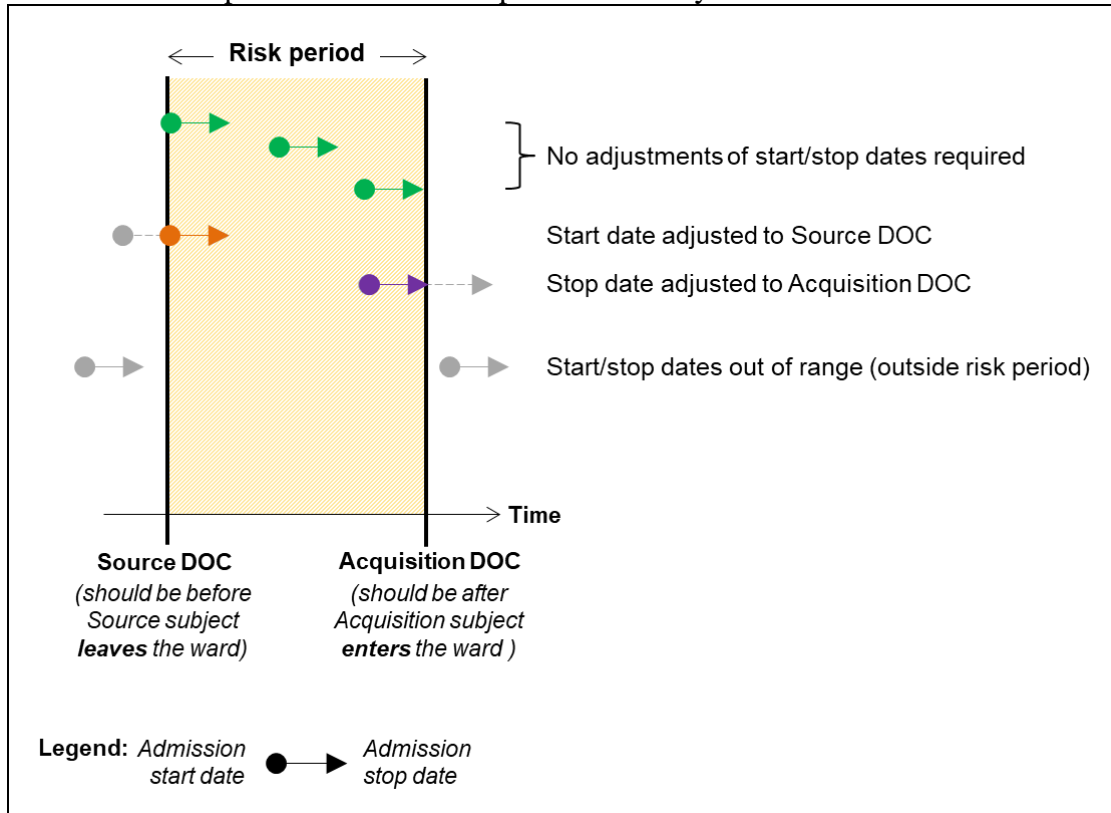

**Demo Table 4: Summary of admission overlap for the patient pairs in Demo Table 3, based on the full admission data provided in Annex A.**

Further details on how the criteria are met is shown in Demo Table 5 for selected outcomes highlighted in green/blue here.

*Note: The Patient ID and Isolate ID stated here are for purpose of illustration and not actual patient information.*

| Acquisition patient | Acquisition isolate | Source patient | Source isolate | Hospital Direct | Hospital Indirect | No Hospital Contact | Ward Direct | Ward Indirect | No Ward Contact | Bed Indirect | No Bed Contact | Discipline Direct | Discipline Indirect | No Discipline Contact |
|---------------------|---------------------|----------------|----------------|-----------------|-------------------|---------------------|-------------|---------------|-----------------|--------------|----------------|-------------------|---------------------|-----------------------|
| Patient 40          | CF27                | Patient 48     | CF25           | Hospital Direct |                   |                     | Ward Direct |               |                 |              | No Bed Contact | Discipline Direct |                     |                       |
| Patient 14          | CF31                | Patient 40     | CF27           | Hospital Direct | Hospital Indirect |                     |             |               | No Ward Contact |              | No Bed Contact |                   |                     | No Discipline Contact |
| Patient 14          | CF31                | Patient 59     | CF28           | Hospital Direct | Hospital Indirect |                     |             |               | No Ward Contact |              | No Bed Contact |                   |                     | No Discipline Contact |
| Patient 14          | CF31                | Patient 21     | CF30           | Hospital Direct |                   |                     |             |               | No Ward Contact |              | No Bed Contact |                   |                     | No Discipline Contact |
| Patient 14          | CF31                | Patient 48     | CF25           | Hospital Direct | Hospital Indirect |                     |             |               | No Ward Contact |              | No Bed Contact |                   |                     | No Discipline Contact |
| Patient 36          | CF20                | Patient 51     | CF10           |                 |                   | No Hospital Contact |             |               | No Ward Contact |              | No Bed Contact |                   |                     | No Discipline Contact |
| Patient 24          | CF40                | Patient 38     | CF29           |                 | Hospital Indirect |                     |             | Ward Indirect |                 |              | No Bed Contact |                   | Discipline Indirect |                       |
| Patient 59          | CF28                | Patient 40     | CF27           | Hospital Direct |                   |                     |             |               | No Ward Contact |              | No Bed Contact | Discipline Direct |                     |                       |
| Patient 59          | CF28                | Patient 48     | CF25           | Hospital Direct |                   |                     | Ward Direct |               |                 |              | No Bed Contact | Discipline Direct |                     |                       |
| Patient 18          | CF15                | Patient 4      | CF1            | Hospital Direct | Hospital Indirect |                     | Ward Direct | Ward Indirect |                 |              | No Bed Contact | Discipline Direct | Discipline Indirect |                       |
| Patient 21          | CF30                | Patient 40     | CF27           | Hospital Direct | Hospital Indirect |                     |             |               | No Ward Contact |              | No Bed Contact | Discipline Direct | Discipline Indirect |                       |
| Patient 21          | CF30                | Patient 59     | CF28           | Hospital Direct |                   |                     |             |               | No Ward Contact |              | No Bed Contact | Discipline Direct |                     |                       |
| Patient 21          | CF30                | Patient 48     | CF25           | Hospital Direct |                   |                     | Ward Direct |               |                 |              | No Bed Contact | Discipline Direct |                     |                       |

**Demo Table 5: Examples of how the criteria are met for hospital direct and hospital indirect contact (similarly highlighted green/blue here to match Demo Table 4). Note: The Patient ID, Isolate ID and dates stated here are for purpose of illustration and not actual patient information.**

| Acquisition patient | Acquisition isolate | Acquisition Date of Culture (DOC) | Source patient | Source isolate | Source Date of Culture (DOC) | Acquisition admission start date | Acquisition admission stop date | Source admission start date | Source admission stop date | Criteria met to determine contact category | Contact category  | Remarks                                                                                                                                         |
|---------------------|---------------------|-----------------------------------|----------------|----------------|------------------------------|----------------------------------|---------------------------------|-----------------------------|----------------------------|--------------------------------------------|-------------------|-------------------------------------------------------------------------------------------------------------------------------------------------|
| Patient_24          | CF40                | 2019.383562                       | Patient_38     | CF29           | 2018.832877                  | 2019.375343                      | 2019.383562                     | 2018.846576                 | 2018.868493                | 2018.868493 < 2019.375343                  | Hospital Indirect | Source admission stop date < Acquisition admission start date;<br>Dates are already within risk period (between Source DOC and Acquisition DOC) |
| Patient_24          | CF40                | 2019.383562                       | Patient_38     | CF29           | 2018.832877                  | 2019.375343                      | 2019.383562                     | 2018.950685                 | 2018.953425                | 2018.953425 < 2019.375343                  | Hospital Indirect |                                                                                                                                                 |
| Patient_24          | CF40                | 2019.383562                       | Patient_38     | CF29           | 2018.832877                  | 2019.375343                      | 2019.383562                     | 2018.950685                 | 2018.953425                | 2018.953425 < 2019.375343                  | Hospital Indirect |                                                                                                                                                 |
| Patient_24          | CF40                | 2019.383562                       | Patient_38     | CF29           | 2018.832877                  | 2019.375343                      | 2019.383562                     | 2018.80548                  | 2018.835617                | 2018.835617 < 2019.375343                  | Hospital Indirect |                                                                                                                                                 |
| Patient_24          | CF40                | 2019.383562                       | Patient_38     | CF29           | 2018.832877                  | 2019.375343                      | 2019.383562                     | 2018.835617                 | 2018.841096                | 2018.841096 < 2019.375343                  | Hospital Indirect |                                                                                                                                                 |
| Patient_24          | CF40                | 2019.383562                       | Patient_38     | CF29           | 2018.832877                  | 2019.375343                      | 2019.383562                     | 2018.846576                 | 2018.868493                | 2018.868493 < 2019.375343                  | Hospital Indirect |                                                                                                                                                 |
| Patient_24          | CF40                | 2019.383562                       | Patient_38     | CF29           | 2018.832877                  | 2019.375343                      | 2019.383562                     | 2018.835617                 | 2018.841096                | 2018.841096 < 2019.375343                  | Hospital Indirect |                                                                                                                                                 |
| Patient_24          | CF40                | 2019.383562                       | Patient_38     | CF29           | 2018.832877                  | 2019.375343                      | 2019.383562                     | 2018.80548                  | 2018.835617                | 2018.835617 < 2019.375343                  | Hospital Indirect |                                                                                                                                                 |
| Patient_24          | CF40                | 2019.383562                       | Patient_38     | CF29           | 2018.832877                  | 2019.375343                      | 2019.383562                     | 2018.841096                 | 2018.846576                | 2018.846576 < 2019.375343                  | Hospital Indirect |                                                                                                                                                 |
| Patient_24          | CF40                | 2019.383562                       | Patient_38     | CF29           | 2018.832877                  | 2019.375343                      | 2019.383562                     | 2018.841096                 | 2018.846576                | 2018.846576 < 2019.375343                  | Hospital Indirect |                                                                                                                                                 |
| Patient_24          | CF40                | 2019.383562                       | Patient_38     | CF29           | 2018.832877                  | 2019.375343                      | 2019.383562                     | 2018.841096                 | 2018.846576                | 2018.846576 < 2019.375343                  | Hospital Indirect |                                                                                                                                                 |
| Patient_24          | CF40                | 2019.383562                       | Patient_38     | CF29           | 2018.832877                  | 2019.375343                      | 2019.383562                     | 2018.953425                 | 2018.953425                | 2018.953425 < 2019.375343                  | Hospital Indirect |                                                                                                                                                 |
| Patient_24          | CF40                | 2019.383562                       | Patient_38     | CF29           | 2018.832877                  | 2019.375343                      | 2019.383562                     | 2018.953425                 | 2018.953425                | 2018.953425 < 2019.375343                  | Hospital Indirect |                                                                                                                                                 |
| Patient_24          | CF40                | 2019.383562                       | Patient_38     | CF29           | 2018.832877                  | 2019.375343                      | 2019.383562                     | 2018.841096                 | 2018.846576                | 2018.846576 < 2019.375343                  | Hospital Indirect |                                                                                                                                                 |
| Patient_24          | CF40                | 2019.383562                       | Patient_38     | CF29           | 2018.832877                  | 2019.375343                      | 2019.383562                     | 2018.953425                 | 2018.953425                | 2018.953425 < 2019.375343                  | Hospital Indirect |                                                                                                                                                 |
| Patient_24          | CF40                | 2019.383562                       | Patient_38     | CF29           | 2018.832877                  | 2019.383562                      | 2019.386302                     | 2018.846576                 | 2018.868493                | 2018.868493 < 2019.383562                  | Hospital Indirect |                                                                                                                                                 |
| Patient_24          | CF40                | 2019.383562                       | Patient_38     | CF29           | 2018.832877                  | 2019.383562                      | 2019.386302                     | 2018.950685                 | 2018.953425                | 2018.953425 < 2019.383562                  | Hospital Indirect |                                                                                                                                                 |
| Patient_24          | CF40                | 2019.383562                       | Patient_38     | CF29           | 2018.832877                  | 2019.383562                      | 2019.386302                     | 2018.950685                 | 2018.953425                | 2018.953425 < 2019.383562                  | Hospital Indirect |                                                                                                                                                 |
| Patient_24          | CF40                | 2019.383562                       | Patient_38     | CF29           | 2018.832877                  | 2019.383562                      | 2019.386302                     | 2018.80548                  | 2018.835617                | 2018.835617 < 2019.383562                  | Hospital Indirect |                                                                                                                                                 |
| Patient_24          | CF40                | 2019.383562                       | Patient_38     | CF29           | 2018.832877                  | 2019.383562                      | 2019.386302                     | 2018.835617                 | 2018.841096                | 2018.841096 < 2019.383562                  | Hospital Indirect |                                                                                                                                                 |
| Patient_24          | CF40                | 2019.383562                       | Patient_38     | CF29           | 2018.832877                  | 2019.383562                      | 2019.386302                     | 2018.846576                 | 2018.868493                | 2018.868493 < 2019.383562                  | Hospital Indirect |                                                                                                                                                 |
| Patient_24          | CF40                | 2019.383562                       | Patient_38     | CF29           | 2018.832877                  | 2019.383562                      | 2019.386302                     | 2018.835617                 | 2018.841096                | 2018.841096 < 2019.383562                  | Hospital Indirect |                                                                                                                                                 |
| Patient_24          | CF40                | 2019.383562                       | Patient_38     | CF29           | 2018.832877                  | 2019.383562                      | 2019.386302                     | 2018.80548                  | 2018.835617                | 2018.835617 < 2019.383562                  | Hospital Indirect |                                                                                                                                                 |
| Patient_24          | CF40                | 2019.383562                       | Patient_38     | CF29           | 2018.832877                  | 2019.383562                      | 2019.386302                     | 2018.841096                 | 2018.846576                | 2018.846576 < 2019.383562                  | Hospital Indirect |                                                                                                                                                 |
| Patient_24          | CF40                | 2019.383562                       | Patient_38     | CF29           | 2018.832877                  | 2019.383562                      | 2019.386302                     | 2018.841096                 | 2018.846576                | 2018.846576 < 2019.383562                  | Hospital Indirect |                                                                                                                                                 |
| Patient_24          | CF40                | 2019.383562                       | Patient_38     | CF29           | 2018.832877                  | 2019.383562                      | 2019.386302                     | 2018.841096                 | 2018.846576                | 2018.846576 < 2019.383562                  | Hospital Indirect |                                                                                                                                                 |
| Patient_24          | CF40                | 2019.383562                       | Patient_38     | CF29           | 2018.832877                  | 2019.383562                      | 2019.386302                     | 2018.953425                 | 2018.953425                | 2018.953425 < 2019.383562                  | Hospital Indirect |                                                                                                                                                 |
| Patient_24          | CF40                | 2019.383562                       | Patient_38     | CF29           | 2018.832877                  | 2019.383562                      | 2019.386302                     | 2018.953425                 | 2018.953425                | 2018.953425 < 2019.383562                  | Hospital Indirect |                                                                                                                                                 |





|            |      |             |            |      |             |             |             |             |             |                                                                   |                    |                                                                                                                                                                                                                                                                                                                        |
|------------|------|-------------|------------|------|-------------|-------------|-------------|-------------|-------------|-------------------------------------------------------------------|--------------------|------------------------------------------------------------------------------------------------------------------------------------------------------------------------------------------------------------------------------------------------------------------------------------------------------------------------|
| Patient_21 | CF30 | 2018.846576 | Patient_59 | CF28 | 2018.819178 | 2018.821918 | 2018.852055 | 2018.827398 | 2018.830137 | 2018.827398 <=<br>2018.846576 &&<br>2018.830137 >=<br>2018.821918 | Hospital<br>Direct | period; i.e. Acquisition<br>DOC 2018.846576)                                                                                                                                                                                                                                                                           |
| Patient_21 | CF30 | 2018.846576 | Patient_59 | CF28 | 2018.819178 | 2018.821918 | 2018.852055 | 2018.816439 | 2018.827398 | 2018.819178 <=<br>2018.846576 &&<br>2018.827398 >=<br>2018.821918 | Hospital<br>Direct | Source admission start<br>date <= Acquisition<br>admission stop date# &&<br>Source admission stop date<br>>= Acquisition admission<br>start date<br>(Source admission start<br>date & Acquisition<br>admission stop date<br>limited to risk period,<br>i.e. Acquisition DOC<br>2018.846576; Source DOC<br>2018.819178) |

## (C) Selection of controls

For control pair selection, the same source patient and isolate as the case pair was retained in the control pair. The section below explains how random selection was performed to identify the control acquisition patient and isolate.

1. For a given **clonal transmission** case pair, the control acquisition patient must have
  - Different patient from the case acquisition patient
  - Different patient from the case source patient
  - Date of culture same day or after the case acquisition patient
  - The control acquisition patient must **not** meet clonal transmission criteria with the source or acquisition patient in the case pair
2. For a given **plasmid-mediated transmission** case pair,
  - Different patient from the case acquisition patient
  - Different patient from the case source patient
  - Date of culture same day or after the case acquisition patient
  - The control acquisition patient must not meet clonal transmission criteria with the source or acquisition patient in the case pair
  - The control acquisition patient must also **not** meet the plasmid-mediated transmission criteria with the source or acquisition patient in the case pair

The controls were selected independent of species, CP gene and exposure information (hospital, ward, discipline, procedure or community contact).

The custom code files for this step are **find\_controls\_part1.pl** and **find\_controls\_part2.pl**, and can be obtained from [https://github.com/nataschamay/cp\\_transmission\\_2021/tree/main/4\\_find\\_controls](https://github.com/nataschamay/cp_transmission_2021/tree/main/4_find_controls)

***Pseudocode for find\_controls\_part1.pl for clonal transmission case pairs  
(a similar code was used for plasmid-mediated transmission case pairs, with the necessary adaptations to the criteria).***

```
For EACH acquisition isolate that has been established to be linked by clonal transmission{  
    Loop through ALL other patients that are NOT linked by clonal transmission{  
        if (the "other" patient meets all the following criteria  
            (1) Different patient from the acquisition patient,  
            (2) Different patient from all the source patients linked by clonal transmission to the acquisition patient  
                (source patients were stored in a hash-of-arrays "acquisition patients => [array of source patients]"  
                to enable this check), and  
            (3) Date of culture same day or after the acquisition patient)  
        {  
            Output the acquisition isolate and the valid control patient to a file  
        }  
    }  
}
```

The above method would result in a file that identifies all possible control acquisition patients which correspond to a given case pair. As stated above, the control source patient is identical to the source patient in the case pair.

This list of candidate controls for each acquisition patient is processed manually (using Microsoft Excel) to:

1. sort by Acquisition\_PatientID and Control\_PatientID,
2. remove duplicate control isolates from the same patient,
3. remove control isolates of patients that lack admission data,

Subsequently, the list is processed as follows:

***Pseudocode for find\_controls\_part2.pl for clonal transmission case pairs  
(a similar code was used for plasmid-mediated transmission case pairs, with the necessary adaptations).***

```
For EACH acquisition-source pair{  
    For EACH acquisition-candidate control pair{  
        if (control isolate is NOT linked by clonal transmission to the source isolate){  
            Accept the control as valid and store in an array  
        }  
    }  
}
```

}

Randomly select a valid control for this acquisition patient  
 (by using a random number generator to determine the index of the array of valid controls to be selected)

}

**Demo Table 6: Control selection for Source-Acquisition case pairs established in Demo Table 3 above**

| Acquisition patient | Acquisition isolate | Acquisition DOC | Acquisition Species  | Acquisition CP gene | Source patient | Source isolate | Control patient | Control isolate | Control DOC | Control Species       | Control CP gene | Patient check                                                                           | Date check                                                                    |
|---------------------|---------------------|-----------------|----------------------|---------------------|----------------|----------------|-----------------|-----------------|-------------|-----------------------|-----------------|-----------------------------------------------------------------------------------------|-------------------------------------------------------------------------------|
| Patient_40          | CF27                | 2018.816439     | Citrobacter freundii | blaNDM-1            | Patient_48     | CF25           | Patient_62      | CR1             | 2019.326028 | Citrobacter rodentium | blaNDM-1        | Control isolate is from a different patient compared to Acquisition and Source isolates | Control isolate date of culture is the same or later than Acquisition isolate |
| Patient_14          | CF31                | 2018.849315     | Citrobacter freundii | blaNDM-1            | Patient_40     | CF27           | Patient_63      | EC05            | 2019.80548  | Escherichia coli      | blaKPC-2        |                                                                                         |                                                                               |
| Patient_14          | CF31                | 2018.849315     | Citrobacter freundii | blaNDM-1            | Patient_59     | CF28           | Patient_16      | CF14            | 2019.70685  | Citrobacter freundii  | blaNDM-1        |                                                                                         |                                                                               |
| Patient_14          | CF31                | 2018.849315     | Citrobacter freundii | blaNDM-1            | Patient_21     | CF30           | Patient_64      | KP14            | 2019.476713 | Klebsiella pneumoniae | blaOXA-48       |                                                                                         |                                                                               |
| Patient_14          | CF31                | 2018.849315     | Citrobacter freundii | blaNDM-1            | Patient_48     | CF25           | Patient_62      | CR1             | 2019.326028 | Citrobacter rodentium | blaNDM-1        |                                                                                         |                                                                               |
| Patient_36          | CF20                | 2020.227398     | Citrobacter freundii | blaNDM-1            | Patient_51     | CF10           | Patient_66      | ECL43           | 2020.232877 | Enterobacter cloacae  | blaIMI-1        |                                                                                         |                                                                               |
| Patient_24          | CF40                | 2019.383562     | Citrobacter freundii | blaNDM-1, blaOXA-48 | Patient_38     | CF29           | Patient_67      | KP15            | 2019.597261 | Klebsiella pneumoniae | blaNDM-1        |                                                                                         |                                                                               |
| Patient_59          | CF28                | 2018.819178     | Citrobacter freundii | blaNDM-1            | Patient_40     | CF27           | Patient_6       | EC01            | 2019.446576 | Escherichia coli      | blaNDM-1        |                                                                                         |                                                                               |
| Patient_59          | CF28                | 2018.819178     | Citrobacter freundii | blaNDM-1            | Patient_48     | CF25           | Patient_68      | EC07            | 2019.142466 | Escherichia coli      | blaNDM-1        |                                                                                         |                                                                               |
| Patient_18          | CF15                | 2019.750685     | Citrobacter freundii | blaNDM-1            | Patient_4      | CF1            | Patient_69      | EC08            | 2020.180822 | Escherichia coli      | blaKPC-2        |                                                                                         |                                                                               |
| Patient_21          | CF30                | 2018.846576     | Citrobacter freundii | blaNDM-1            | Patient_40     | CF27           | Patient_70      | KP16            | 2019.60274  | Klebsiella pneumoniae | blaIMP-1        |                                                                                         |                                                                               |
| Patient_21          | CF30                | 2018.846576     | Citrobacter freundii | blaNDM-1            | Patient_59     | CF28           | Patient_71      | KP17            | 2019.397261 | Klebsiella pneumoniae | blaKPC-2        |                                                                                         |                                                                               |
| Patient_21          | CF30                | 2018.846576     | Citrobacter freundii | blaNDM-1            | Patient_48     | CF25           | Patient_72      | KP18            | 2019.443836 | Klebsiella pneumoniae | blaKPC-2        |                                                                                         |                                                                               |

**Annex A: Full admission data for selected patients relevant to examples used above.**

*Note: The Patient ID, locations and dates stated here are for purpose of illustration and not actual patient information.*

| Patient ID | Admission Hospital | Admission Ward | Discipline                                  | Admission Start Date | Admission Stop Date |
|------------|--------------------|----------------|---------------------------------------------|----------------------|---------------------|
| Patient 4  | Hospital A         | Ward 17        | general medicine                            | 2015.063014          | 2015.073973         |
| Patient 4  | Hospital A         | Ward 17        | general medicine                            | 2015.073973          | 2015.073973         |
| Patient 4  | Hospital A         | Ward 22        | general medicine                            | 2015.10137           | 2015.136987         |
| Patient 4  | Hospital A         | Ward 10        | general medicine                            | 2015.150685          | 2015.156165         |
| Patient 4  | Hospital A         | Ward 22        | general medicine                            | 2015.156165          | 2015.161644         |
| Patient 4  | Hospital A         | Ward 43        | cardiology                                  | 2015.210959          | 2015.227398         |
| Patient 4  | Hospital A         | Ward 43        | cardiology                                  | 2015.252055          | 2015.268493         |
| Patient 4  | Hospital A         | Ward 18        | general medicine                            | 2015.342466          | 2015.347945         |
| Patient 4  | Hospital A         | Ward 17        | general medicine                            | 2015.347945          | 2015.347945         |
| Patient 4  | Hospital A         | Ward 17        | nephrology                                  | 2015.473973          | 2015.482192         |
| Patient 4  | Hospital A         | Ward 11        | nephrology                                  | 2015.482192          | 2015.512329         |
| Patient 4  | Hospital A         | Ward 11        | nephrology                                  | 2015.545206          | 2015.556165         |
| Patient 4  | Hospital A         | Ward 11        | nephrology                                  | 2015.556165          | 2015.572603         |
| Patient 4  | Hospital A         | Ward 30        | general surgery                             | 2015.638356          | 2015.638356         |
| Patient 4  | Hospital A         | Ward 10        | nephrology                                  | 2015.742466          | 2015.745206         |
| Patient 4  | Hospital C         | Ward 44        | Ortho / Gen Ortho                           | 2015.816439          | 2015.821918         |
| Patient 4  | Hospital A         | Ward 18        | general surgery                             | 2015.863014          | 2015.868493         |
| Patient 4  | Hospital A         | Ward 3         | general surgery                             | 2015.958904          | 2015.961644         |
| Patient 4  | Hospital C         | Ward 44        | Ortho / Gen Ortho                           | 2015.986302          | 2015.991781         |
| Patient 4  | Hospital C         | Ward 45        | Surg / Gen Surg                             | 2016.068493          | 2016.071233         |
| Patient 4  | Hospital A         | Ward 2         | general medicine                            | 2016.109589          | 2016.126028         |
| Patient 4  | Hospital A         | Ward 6         | general surgery                             | 2016.249315          | 2016.257535         |
| Patient 4  | Hospital A         | Ward 10        | general medicine                            | 2016.312329          | 2016.315069         |
| Patient 4  | Hospital A         | Ward 18        | general medicine                            | 2016.315069          | 2016.331507         |
| Patient 4  | Hospital A         | Ward 13        | general surgery                             | 2016.473973          | 2016.476713         |
| Patient 4  | Hospital A         | Ward 3         | general surgery                             | 2016.80548           | 2016.808219         |
| Patient 4  | Hospital A         | Ward 3         | general surgery                             | 2016.808219          | 2016.810959         |
| Patient 4  | Hospital A         | Ward 19        | general medicine                            | 2016.824658          | 2016.824658         |
| Patient 4  | Hospital A         | Ward 22        | general medicine                            | 2016.824658          | 2016.843836         |
| Patient 4  | Hospital A         | Ward 6         | general surgery                             | 2016.986302          | 2016.994521         |
| Patient 4  | Hospital A         | Ward 6         | general surgery                             | 2017.407112          | 2017.412576         |
| Patient 4  | Hospital A         | Ward 18        | endocrinology                               | 2017.598368          | 2017.603833         |
| Patient 4  | Hospital A         | Ward 6         | endocrinology                               | 2017.603833          | 2017.606565         |
| Patient 4  | Hospital A         | Ward 22        | endocrinology                               | 2017.606565          | 2017.625691         |
| Patient 4  | Hospital A         | Ward 13        | plastic, reconstruction & aesthetic surgery | 2017.732248          | 2017.781429         |
| Patient 4  | Hospital A         | Ward 22        | general medicine                            | 2017.885254          | 2017.887986         |
| Patient 4  | Hospital A         | Ward 36        | orthopaedics                                | 2018.049315          | 2018.052055         |
| Patient 4  | Hospital A         | Ward 36        | orthopaedics                                | 2018.052055          | 2018.054795         |
| Patient 4  | Hospital A         | Ward 36        | orthopaedics                                | 2018.054795          | 2018.071233         |
| Patient 4  | Hospital A         | Ward 36        | orthopaedics                                | 2018.071233          | 2018.079452         |
| Patient 4  | Hospital A         | Ward 29        | nephrology                                  | 2018.29863           | 2018.30411          |
| Patient 4  | Hospital A         | Ward 11        | nephrology                                  | 2018.331507          | 2018.336987         |
| Patient 4  | Hospital C         | Ward 46        | Med / Gen Med                               | 2018.454795          | 2018.457535         |
| Patient 4  | Hospital C         | Ward 46        | Med / Gen Med                               | 2018.457535          | 2018.457535         |
| Patient 4  | Hospital C         | Ward 46        | Med / Gen Med                               | 2018.457535          | 2018.463014         |
| Patient 4  | Hospital A         | Ward 36        | general medicine                            | 2018.465754          | 2018.479452         |
| Patient 4  | Hospital A         | Ward 22        | general medicine                            | 2018.479452          | 2018.526028         |
| Patient 4  | Hospital A         | Ward 26        | urology                                     | 2018.558904          | 2018.586302         |

|            |            |         |                  |             |             |
|------------|------------|---------|------------------|-------------|-------------|
| Patient 4  | Hospital A | Ward 12 | urology          | 2018.586302 | 2018.693151 |
| Patient 4  | Hospital A | Ward 47 | neurosurgery     | 2018.750685 | 2018.764384 |
| Patient 4  | Hospital A | Ward 48 | neurosurgery     | 2018.764384 | 2018.783562 |
| Patient 4  | Hospital A | Ward 48 | neurosurgery     | 2018.783562 | 2018.8      |
| Patient 4  | Hospital A | Ward 47 | neurosurgery     | 2018.8      | 2018.810959 |
| Patient 4  | Hospital A | Ward 48 | neurosurgery     | 2018.810959 | 2018.931507 |
| Patient 4  | Hospital A | Ward 3  | general surgery  | 2019.09863  | 2019.128767 |
| Patient 4  | Hospital A | Ward 11 | nephrology       | 2019.134247 | 2019.147945 |
| Patient 4  | Hospital A | Ward 11 | nephrology       | 2019.147945 | 2019.147945 |
| Patient 4  | Hospital A | Ward 11 | nephrology       | 2019.147945 | 2019.175343 |
| Patient 4  | Hospital A | Ward 22 | general medicine | 2019.180822 | 2019.183562 |
| Patient 4  | Hospital A | Ward 48 | vascular surgery | 2019.20274  | 2019.238356 |
| Patient 4  | Hospital A | Ward 5  | vascular surgery | 2019.238356 | 2019.265754 |
| Patient 4  | Hospital A | Ward 17 | general surgery  | 2019.293151 | 2019.323288 |
| Patient 4  | Hospital A | Ward 3  | general surgery  | 2019.323288 | 2019.410959 |
| Patient 4  | Hospital A | Ward 6  | general surgery  | 2019.410959 | 2019.413699 |
| Patient 4  | Hospital A | Ward 15 | general surgery  | 2019.413699 | 2019.443836 |
| Patient 4  | Hospital A | Ward 27 | general surgery  | 2019.443836 | 2019.512329 |
| Patient 4  | Hospital A | Ward 15 | general surgery  | 2019.512329 | 2019.515069 |
| Patient 14 | Hospital A | Ward 1  | general medicine | 2017.180336 | 2017.1858   |
| Patient 14 | Hospital A | Ward 2  | general surgery  | 2018.147945 | 2018.156165 |
| Patient 14 | Hospital A | Ward 3  | general surgery  | 2018.156165 | 2018.158904 |
| Patient 14 | Hospital A | Ward 4  | general medicine | 2018.734247 | 2018.736987 |
| Patient 14 | Hospital A | Ward 2  | hpb              | 2018.827398 | 2018.843836 |
| Patient 14 | Hospital A | Ward 3  | hpb              | 2018.843836 | 2018.852055 |
| Patient 14 | Hospital A | Ward 3  | hpb              | 2018.852055 | 2018.868493 |
| Patient 18 | Hospital A | Ward 5  | general surgery  | 2016.320548 | 2016.350685 |
| Patient 18 | Hospital A | Ward 6  | general surgery  | 2016.509589 | 2016.515069 |
| Patient 18 | Hospital A | Ward 6  | general surgery  | 2016.515069 | 2016.547945 |
| Patient 18 | Hospital B | Ward 7  | pulmonology      | 2017.172139 | 2017.1858   |
| Patient 18 | Hospital B | Ward 8  | GE & Hep         | 2017.45356  | 2017.459024 |
| Patient 18 | Hospital B | Ward 9  | GE & Hep         | 2017.459024 | 2017.475418 |
| Patient 18 | Hospital A | Ward 3  | general surgery  | 2017.814215 | 2017.81968  |
| Patient 18 | Hospital A | Ward 10 | general medicine | 2017.86886  | 2017.877057 |
| Patient 18 | Hospital A | Ward 11 | general medicine | 2018.065754 | 2018.082192 |
| Patient 18 | Hospital A | Ward 3  | general surgery  | 2018.260274 | 2018.263014 |
| Patient 18 | Hospital A | Ward 3  | general surgery  | 2018.263014 | 2018.284932 |
| Patient 18 | Hospital A | Ward 3  | general surgery  | 2019.10685  | 2019.145206 |
| Patient 18 | Hospital A | Ward 12 | general surgery  | 2019.221918 | 2019.227398 |
| Patient 18 | Hospital A | Ward 5  | general surgery  | 2019.227398 | 2019.230137 |
| Patient 18 | Hospital A | Ward 5  | general surgery  | 2019.230137 | 2019.230137 |
| Patient 18 | Hospital A | Ward 5  | general surgery  | 2019.230137 | 2019.30137  |
| Patient 18 | Hospital A | Ward 5  | general surgery  | 2019.30137  | 2019.353425 |
| Patient 18 | Hospital A | Ward 6  | general surgery  | 2019.375343 | 2019.394521 |
| Patient 18 | Hospital A | Ward 3  | general surgery  | 2019.394521 | 2019.397261 |
| Patient 18 | Hospital A | Ward 3  | general surgery  | 2019.397261 | 2019.454795 |
| Patient 18 | Hospital A | Ward 13 | general surgery  | 2019.509589 | 2019.512329 |
| Patient 18 | Hospital A | Ward 6  | general surgery  | 2019.512329 | 2019.575343 |
| Patient 18 | Hospital A | Ward 14 | vascular surgery | 2019.786302 | 2019.810959 |
| Patient 18 | Hospital A | Ward 15 | vascular surgery | 2019.810959 | 2019.816439 |
| Patient 18 | Hospital A | Ward 14 | vascular surgery | 2019.816439 | 2019.884932 |
| Patient 18 | Hospital A | Ward 14 | vascular surgery | 2019.884932 | 2019.890411 |
| Patient 21 | Hospital A | Ward 16 | neurology        | 2016.671233 | 2016.679452 |

|            |            |         |                  |             |             |
|------------|------------|---------|------------------|-------------|-------------|
| Patient 21 | Hospital A | Ward 16 | neurology        | 2016.679452 | 2016.70411  |
| Patient 21 | Hospital A | Ward 17 | general medicine | 2018.797261 | 2018.80548  |
| Patient 21 | Hospital A | Ward 18 | general medicine | 2018.821918 | 2018.852055 |
| Patient 21 | Hospital A | Ward 15 | general medicine | 2018.945206 | 2018.953425 |
| Patient 24 | Hospital A | Ward 6  | general surgery  | 2019.375343 | 2019.383562 |
| Patient 24 | Hospital A | Ward 6  | general surgery  | 2019.383562 | 2019.386302 |
| Patient 24 | Hospital A | Ward 6  | general surgery  | 2019.386302 | 2019.391781 |
| Patient 24 | Hospital A | Ward 3  | general surgery  | 2019.438356 | 2019.449315 |
| Patient 24 | Hospital A | Ward 3  | general surgery  | 2019.449315 | 2019.463014 |
| Patient 24 | Hospital A | Ward 6  | general surgery  | 2019.463014 | 2019.471233 |
| Patient 24 | Hospital A | Ward 15 | general surgery  | 2019.471233 | 2019.50411  |
| Patient 24 | Hospital A | Ward 15 | general surgery  | 2019.50411  | 2019.553425 |
| Patient 24 | Hospital A | Ward 6  | general surgery  | 2019.375343 | 2019.383562 |
| Patient 24 | Hospital A | Ward 6  | general surgery  | 2019.383562 | 2019.386302 |
| Patient 24 | Hospital A | Ward 6  | general surgery  | 2019.386302 | 2019.391781 |
| Patient 24 | Hospital A | Ward 3  | general surgery  | 2019.438356 | 2019.449315 |
| Patient 24 | Hospital A | Ward 3  | general surgery  | 2019.449315 | 2019.463014 |
| Patient 24 | Hospital A | Ward 6  | general surgery  | 2019.463014 | 2019.471233 |
| Patient 24 | Hospital A | Ward 15 | general surgery  | 2019.471233 | 2019.50411  |
| Patient 24 | Hospital A | Ward 15 | general surgery  | 2019.50411  | 2019.553425 |
| Patient 36 | Hospital A | Ward 19 | general surgery  | 2019.312329 | 2019.317808 |
| Patient 36 | Hospital A | Ward 20 | haematology      | 2019.353425 | 2019.378082 |
| Patient 36 | Hospital A | Ward 20 | haematology      | 2019.378082 | 2019.40548  |
| Patient 36 | Hospital A | Ward 21 | haematology      | 2019.424658 | 2019.430137 |
| Patient 36 | Hospital A | Ward 20 | haematology      | 2019.454795 | 2019.457535 |
| Patient 36 | Hospital A | Ward 22 | haematology      | 2019.843836 | 2019.849315 |
| Patient 36 | Hospital A | Ward 20 | haematology      | 2019.849315 | 2019.865754 |
| Patient 36 | Hospital A | Ward 18 | haematology      | 2019.879452 | 2019.879452 |
| Patient 36 | Hospital A | Ward 23 | haematology      | 2019.879452 | 2019.893151 |
| Patient 36 | Hospital A | Ward 20 | haematology      | 2019.909589 | 2019.917808 |
| Patient 36 | Hospital A | Ward 20 | haematology      | 2019.964384 | 2019.994521 |
| Patient 36 | Hospital A | Ward 24 | haematology      | 2020.008219 | 2020.010959 |
| Patient 36 | Hospital A | Ward 20 | haematology      | 2020.010959 | 2020.013699 |
| Patient 36 | Hospital A | Ward 20 | haematology      | 2020.013699 | 2020.019178 |
| Patient 36 | Hospital A | Ward 20 | haematology      | 2020.038356 | 2020.054795 |
| Patient 36 | Hospital A | Ward 21 | haematology      | 2020.073973 | 2020.084932 |
| Patient 36 | Hospital A | Ward 20 | haematology      | 2020.084932 | 2020.093151 |
| Patient 36 | Hospital A | Ward 20 | haematology      | 2020.10137  | 2020.131507 |
| Patient 36 | Hospital A | Ward 20 | haematology      | 2020.131507 | 2020.136987 |
| Patient 36 | Hospital A | Ward 23 | haematology      | 2020.158904 | 2020.2      |
| Patient 36 | Hospital A | Ward 20 | haematology      | 2020.227398 | 2020.235617 |
| Patient 36 | Hospital A | Ward 15 | haematology      | 2020.235617 | 2020.249315 |
| Patient 36 | Hospital A | Ward 23 | haematology      | 2020.284932 | 2020.287672 |
| Patient 36 | Hospital A | Ward 15 | haematology      | 2020.287672 | 2020.30137  |
| Patient 36 | Hospital A | Ward 15 | haematology      | 2020.312329 | 2020.315069 |
| Patient 36 | Hospital A | Ward 15 | haematology      | 2020.315069 | 2020.350685 |
| Patient 36 | Hospital A | Ward 24 | haematology      | 2020.389041 | 2020.391781 |
| Patient 36 | Hospital A | Ward 15 | haematology      | 2020.40274  | 2020.410959 |
| Patient 38 | Hospital A | Ward 25 | general surgery  | 2018.158904 | 2018.164384 |
| Patient 38 | Hospital A | Ward 6  | general surgery  | 2018.80548  | 2018.835617 |
| Patient 38 | Hospital A | Ward 3  | general surgery  | 2018.835617 | 2018.841096 |
| Patient 38 | Hospital A | Ward 3  | general surgery  | 2018.841096 | 2018.846576 |
| Patient 38 | Hospital A | Ward 3  | general surgery  | 2018.846576 | 2018.868493 |



|            |            |         |                  |             |             |
|------------|------------|---------|------------------|-------------|-------------|
| Patient 38 | Hospital A | Ward 2  | pulmonology      | 2018.950685 | 2018.953425 |
| Patient 38 | Hospital A | Ward 14 | pulmonology      | 2018.953425 | 2018.953425 |
| Patient 38 | Hospital A | Ward 3  | vascular surgery | 2019.520548 | 2019.523288 |
| Patient 38 | Hospital A | Ward 15 | vascular surgery | 2019.523288 | 2019.526028 |
| Patient 38 | Hospital A | Ward 26 | urology          | 2019.663014 | 2019.665754 |
| Patient 38 | Hospital A | Ward 14 | urology          | 2019.665754 | 2019.668493 |
| Patient 38 | Hospital A | Ward 14 | oncology         | 2019.734247 | 2019.830137 |
| Patient 38 | Hospital A | Ward 6  | general surgery  | 2018.80548  | 2018.835617 |
| Patient 38 | Hospital A | Ward 3  | general surgery  | 2018.835617 | 2018.841096 |
| Patient 38 | Hospital A | Ward 3  | general surgery  | 2018.841096 | 2018.846576 |
| Patient 38 | Hospital A | Ward 3  | general surgery  | 2018.846576 | 2018.868493 |
| Patient 38 | Hospital A | Ward 2  | pulmonology      | 2018.950685 | 2018.953425 |
| Patient 38 | Hospital A | Ward 14 | pulmonology      | 2018.953425 | 2018.953425 |
| Patient 38 | Hospital A | Ward 3  | vascular surgery | 2019.520548 | 2019.523288 |
| Patient 38 | Hospital A | Ward 15 | vascular surgery | 2019.523288 | 2019.526028 |
| Patient 38 | Hospital A | Ward 26 | urology          | 2019.663014 | 2019.665754 |
| Patient 38 | Hospital A | Ward 14 | urology          | 2019.665754 | 2019.668493 |
| Patient 38 | Hospital A | Ward 14 | oncology         | 2019.734247 | 2019.830137 |
| Patient 40 | Hospital A | Ward 17 | general medicine | 2018.791781 | 2018.794521 |
| Patient 40 | Hospital A | Ward 17 | general medicine | 2018.794521 | 2018.813699 |
| Patient 40 | Hospital A | Ward 27 | general medicine | 2018.813699 | 2018.816439 |
| Patient 40 | Hospital A | Ward 28 | general medicine | 2018.816439 | 2018.819178 |
| Patient 40 | Hospital A | Ward 29 | general medicine | 2018.819178 | 2018.827398 |
| Patient 40 | Hospital A | Ward 15 | general medicine | 2018.827398 | 2018.835617 |
| Patient 40 | Hospital A | Ward 15 | general surgery  | 2018.868493 | 2018.939726 |
| Patient 40 | Hospital A | Ward 21 | oncology         | 2018.961644 | 2018.972603 |
| Patient 40 | Hospital A | Ward 15 | oncology         | 2018.972603 | 2018.980822 |
| Patient 40 | Hospital A | Ward 15 | oncology         | 2019.019178 | 2019.046576 |
| Patient 40 | Hospital A | Ward 15 | oncology         | 2019.046576 | 2019.076713 |
| Patient 40 | Hospital A | Ward 15 | oncology         | 2019.095891 | 2019.136987 |
| Patient 40 | Hospital A | Ward 15 | oncology         | 2019.172603 | 2019.194521 |
| Patient 40 | Hospital A | Ward 27 | oncology         | 2019.194521 | 2019.197261 |
| Patient 48 | Hospital A | Ward 29 | nephrology       | 2015.523288 | 2015.534247 |
| Patient 48 | Hospital A | Ward 29 | nephrology       | 2015.534247 | 2015.536987 |
| Patient 48 | Hospital A | Ward 11 | nephrology       | 2015.550685 | 2015.553425 |
| Patient 48 | Hospital A | Ward 29 | nephrology       | 2015.926028 | 2015.945206 |
| Patient 48 | Hospital A | Ward 30 | general surgery  | 2016        | 2016        |
| Patient 48 | Hospital A | Ward 30 | general surgery  | 2016.115069 | 2016.115069 |
| Patient 48 | Hospital A | Ward 31 | cardiology       | 2016.156165 | 2016.158904 |
| Patient 48 | Hospital A | Ward 32 | cardiology       | 2016.158904 | 2016.158904 |
| Patient 48 | Hospital A | Ward 10 | nephrology       | 2016.167124 | 2016.172603 |
| Patient 48 | Hospital A | Ward 11 | nephrology       | 2016.172603 | 2016.20274  |
| Patient 48 | Hospital A | Ward 11 | nephrology       | 2016.20274  | 2016.227398 |
| Patient 48 | Hospital A | Ward 18 | nephrology       | 2016.246576 | 2016.249315 |
| Patient 48 | Hospital A | Ward 11 | nephrology       | 2016.249315 | 2016.252055 |
| Patient 48 | Hospital A | Ward 29 | nephrology       | 2016.893151 | 2016.89863  |
| Patient 48 | Hospital A | Ward 29 | nephrology       | 2016.912329 | 2016.912329 |
| Patient 48 | Hospital A | Ward 33 | nephrology       | 2016.912329 | 2016.915069 |
| Patient 48 | Hospital A | Ward 29 | nephrology       | 2016.915069 | 2016.920548 |
| Patient 48 | Hospital A | Ward 17 | general medicine | 2017.139352 | 2017.226784 |
| Patient 48 | Hospital A | Ward 29 | general medicine | 2017.226784 | 2017.226784 |
| Patient 48 | Hospital A | Ward 17 | general medicine | 2017.226784 | 2017.229516 |
| Patient 48 | Hospital A | Ward 29 | general medicine | 2017.229516 | 2017.229516 |

|            |            |         |                  |             |             |
|------------|------------|---------|------------------|-------------|-------------|
| Patient 48 | Hospital A | Ward 17 | general medicine | 2017.229516 | 2017.240445 |
| Patient 48 | Hospital A | Ward 28 | general medicine | 2017.240445 | 2017.248642 |
| Patient 48 | Hospital A | Ward 28 | general medicine | 2017.248642 | 2017.29509  |
| Patient 48 | Hospital A | Ward 17 | general medicine | 2017.29509  | 2017.420773 |
| Patient 48 | Hospital B | Ward 34 | neurology        | 2018.10411  | 2018.10411  |
| Patient 48 | Hospital B | Ward 35 | neurology        | 2018.10411  | 2018.10685  |
| Patient 48 | Hospital B | Ward 34 | neurology        | 2018.10685  | 2018.109589 |
| Patient 48 | Hospital B | Ward 35 | neurology        | 2018.109589 | 2018.112329 |
| Patient 48 | Hospital B | Ward 34 | neurology        | 2018.112329 | 2018.131507 |
| Patient 48 | Hospital A | Ward 6  | general medicine | 2018.734247 | 2018.739726 |
| Patient 48 | Hospital A | Ward 28 | general medicine | 2018.739726 | 2018.750685 |
| Patient 48 | Hospital A | Ward 17 | general medicine | 2018.750685 | 2018.821918 |
| Patient 48 | Hospital A | Ward 17 | general medicine | 2018.821918 | 2019.013699 |
| Patient 48 | Hospital A | Ward 29 | general medicine | 2019.013699 | 2019.013699 |
| Patient 48 | Hospital A | Ward 17 | general medicine | 2019.013699 | 2019.372603 |
| Patient 51 | Hospital A | Ward 30 | orthopaedics     | 2015.556165 | 2015.556165 |
| Patient 51 | Hospital A | Ward 29 | nephrology       | 2015.742466 | 2015.742466 |
| Patient 51 | Hospital A | Ward 29 | nephrology       | 2015.742466 | 2015.761644 |
| Patient 51 | Hospital A | Ward 29 | nephrology       | 2015.8      | 2015.80274  |
| Patient 51 | Hospital A | Ward 29 | nephrology       | 2015.80274  | 2015.810959 |
| Patient 51 | Hospital A | Ward 29 | nephrology       | 2015.810959 | 2015.810959 |
| Patient 51 | Hospital A | Ward 29 | nephrology       | 2015.810959 | 2015.830137 |
| Patient 51 | Hospital A | Ward 29 | nephrology       | 2015.830137 | 2015.852055 |
| Patient 51 | Hospital A | Ward 3  | general surgery  | 2015.868493 | 2015.868493 |
| Patient 51 | Hospital A | Ward 30 | general surgery  | 2016.057535 | 2016.057535 |
| Patient 51 | Hospital A | Ward 36 | orthopaedics     | 2016.142466 | 2016.153425 |
| Patient 51 | Hospital A | Ward 18 | endocrinology    | 2017.532795 | 2017.546456 |
| Patient 51 | Hospital A | Ward 11 | nephrology       | 2017.562849 | 2017.57651  |
| Patient 51 | Hospital A | Ward 30 | hand surgery     | 2018.136987 | 2018.136987 |
| Patient 51 | Hospital D | Ward 37 | pulmonology      | 2018.432877 | 2018.432877 |
| Patient 51 | Hospital D | Ward 38 | pulmonology      | 2018.432877 | 2018.432877 |
| Patient 51 | Hospital D | Ward 39 | pulmonology      | 2018.432877 | 2018.443836 |
| Patient 51 | Hospital D | Ward 40 | pulmonology      | 2018.443836 | 2018.457535 |
| Patient 51 | Hospital D | Ward 37 | general medicine | 2019.079452 | 2019.079452 |
| Patient 51 | Hospital D | Ward 41 | general medicine | 2019.079452 | 2019.090411 |
| Patient 51 | Hospital A | Ward 5  | orthopaedics     | 2019.320548 | 2019.336987 |
| Patient 51 | Hospital D | Ward 37 | general medicine | 2019.347945 | 2019.350685 |
| Patient 51 | Hospital D | Ward 41 | general medicine | 2019.350685 | 2019.372603 |
| Patient 51 | Hospital D | Ward 41 | general medicine | 2019.372603 | 2019.389041 |
| Patient 51 | Hospital D | Ward 27 | general medicine | 2019.389041 | 2019.394521 |
| Patient 51 | Hospital D | Ward 42 | general medicine | 2019.394521 | 2019.40548  |
| Patient 51 | Hospital D | Ward 27 | general medicine | 2019.40548  | 2019.408219 |
| Patient 51 | Hospital D | Ward 27 | general medicine | 2019.408219 | 2019.430137 |
| Patient 59 | Hospital A | Ward 10 | general surgery  | 2018.312329 | 2018.317808 |
| Patient 59 | Hospital A | Ward 17 | general medicine | 2018.808219 | 2018.816439 |
| Patient 59 | Hospital A | Ward 6  | general medicine | 2018.816439 | 2018.827398 |
| Patient 59 | Hospital A | Ward 6  | general medicine | 2018.827398 | 2018.830137 |

## References

1. Marimuthu, K. *et al.* Clinical and Molecular Epidemiology of Carbapenem-Resistant Enterobacteriaceae Among Adult Inpatients in Singapore. *Clinical Infectious Diseases* **64**, S68–S75 (2017).
2. Teo, J. *et al.* Molecular characterization of NDM-1 producing Enterobacteriaceae isolates in Singapore hospitals. *Western Pac Surveill Response J* **3**, 19–24 (2012).
3. Balm, M. N. D., Ngan, G., Jureen, R., Lin, R. T. P. & Teo, J. W. P. OXA-181-producing *Klebsiella pneumoniae* establishing in Singapore. *BMC Infectious Diseases* **13**, (2013).
4. Khong, W. X. *et al.* Tracking inter-institutional spread of NDM and identification of a novel NDM-positive plasmid, pSg1-NDM, using next-generation sequencing approaches. *J Antimicrob Chemother* **71**, 3081–3089 (2016).
5. Martin, M. Cutadapt removes adapter sequences from high-throughput sequencing reads. *EMBnet.journal* **17**, 10–12 (2011).
6. Bankevich, A. *et al.* SPAdes: a new genome assembly algorithm and its applications to single-cell sequencing. *J Comput Biol* **19**, 455–477 (2012).
7. Wick, R. R., Judd, L. M., Gorrie, C. L. & Holt, K. E. Unicycler: Resolving bacterial genome assemblies from short and long sequencing reads. *PLoS Comput Biol* **13**, e1005595 (2017).
8. Urwin, R. & Maiden, M. C. J. Multi-locus sequence typing: a tool for global epidemiology. *Trends Microbiol* **11**, 479–487 (2003).
9. Thomsen, M. C. F. *et al.* A Bacterial Analysis Platform: An Integrated System for Analysing Bacterial Whole Genome Sequencing Data for Clinical Diagnostics and Surveillance. *PLoS ONE* **11**, e0157718 (2016).
10. Wood, D. E. & Salzberg, S. L. Kraken: ultrafast metagenomic sequence classification using exact alignments. *Genome Biology* **15**, R46 (2014).
11. NCBI Beta-Lactamase Database. <https://ftp.ncbi.nlm.nih.gov/pathogen/betalactamases/> (2017).
12. Inouye, M. *et al.* SRST2: Rapid genomic surveillance for public health and hospital microbiology labs. *Genome Medicine* **6**, 90 (2014).
13. Gupta, S. K. *et al.* ARG-ANNOT, a New Bioinformatic Tool To Discover Antibiotic Resistance Genes in Bacterial Genomes. *Antimicrob. Agents Chemother.* **58**, 212 (2014).
14. David, S. *et al.* Epidemic of carbapenem-resistant *Klebsiella pneumoniae* in Europe is driven by nosocomial spread. *Nat Microbiol* **4**, 1919–1929 (2019).
15. Seemann, T. Prokka: rapid prokaryotic genome annotation. *Bioinformatics* **30**, 2068–2069 (2014).
16. Page, A. J. *et al.* Roary: rapid large-scale prokaryote pan genome analysis. *Bioinformatics* **31**, 3691–3693 (2015).
17. Page, A. J. *et al.* SNP-sites: rapid efficient extraction of SNPs from multi-FASTA alignments. *Microb Genom* **2**, e000056 (2016).
18. Croucher, N. J. *et al.* Rapid phylogenetic analysis of large samples of recombinant bacterial whole genome sequences using Gubbins. *Nucleic Acids Res* **43**, e15 (2015).
19. Bouckaert, R. *et al.* BEAST 2.5: An advanced software platform for Bayesian evolutionary analysis. *PLoS Comput Biol* **15**, e1006650 (2019).
20. Stoesser, N. *et al.* Evolutionary History of the Global Emergence of the *Escherichia coli* Epidemic Clone ST131. *mBio* **7**, e02162-15, /mbio/7/2/e02162-15.atom (2016).
21. Bouckaert, R. R. & Drummond, A. J. bModelTest: Bayesian phylogenetic site model averaging and model comparison. *BMC Evol Biol* **17**, 42 (2017).

22. Eyre, D. W. *et al.* Short-term genome stability of serial *Clostridium difficile* ribotype 027 isolates in an experimental gut model and recurrent human disease. *PLoS One* **8**, e63540 (2013).
23. Roosaare, M., Puustusmaa, M., Möls, M., Vaher, M. & Remm, M. PlasmidSeeker: identification of known plasmids from bacterial whole genome sequencing reads. *PeerJ* **6**, e4588 (2018).
