# Supplementary material for: Whole genome sequencing reveals hidden transmission of carbapenemase-producing Enterobacterales
Source: PubMed Central journal article supplement (PMC9160272; doi:10.1038/s41467-022-30637-5), 2022-06-01
Supplement: 41467_2022_30637_MOESM3_ESM.pdf [file 41467_2022_30637_MOESM3_ESM.pdf]

## **Description of Additional Supplementary Files**

File Name: Supplementary Data 1

Description: Detailed listing of the isolates analysed.

File Name: Supplementary Software 1

Description: Custom code for statistical analysis.
